# Supplementary material
Source: publisher figshare collection journal article supplement (https://karger.figshare.com/articles/dataset/_/5120398)
Supplement: Supplementary file 1 [file 1]

**Supplement File 1.** Experimentally verified Fur-binding sites, and proposed Fur-binding sites of known Fur-regulated genes in vibrios (upper case), their position with regards to the translational start of the gene in regulation and the original paper from which the Fur-box was described.

| Specie             | Gene          | Fur-box                           | Dnase<br>Footprin<br>ting | Patser<br>score | Position | Reference            |
|--------------------|---------------|-----------------------------------|---------------------------|-----------------|----------|----------------------|
| <i>V. cholerae</i> | <i>vc0091</i> | cttatttGAGATTCATTATCATCTTCctatccc | no                        | 9.10            | 14       | Mey et al, 2005      |
|                    | <i>vc0091</i> | cttgccttCTTATTTGAGATTCATTATcatctt | no                        | 9.10            | 7        | Mey et al, 2005      |
|                    | <i>ryhb</i>   | ttgactaTTAAATGAGAACTATTATTATTaacc | no                        | 13.45           | -29      | Davis et al, 2005    |
|                    | <i>vc0200</i> | ttttgctTTTAATTAAGATAATTATCactaaaa | no                        | 7.22            | -26      | Mey et al, 2005      |
|                    | <i>vc0284</i> | caataatGAAAATTACTATCATTTGTgattcat | no                        | 12.84           | -86      | Panina et al, 2001   |
|                    | <i>vc0284</i> | cacttgaATCAATAATGAAAATTACTatcattt | no                        | 12.84           | -95      | Mey et al, 2005      |
|                    | <i>vc0364</i> | acgcagtAGAAATAAGAGTGATTCTCttttatt | no                        | 10.35           | -56      | Mey et al, 2005      |
|                    | <i>vc0364</i> | aataagaGTGATTCTCTTTTATTCTtgttcat  | no                        | 10.35           | -47      | Mey et al, 2005      |
|                    | <i>vc0474</i> | tttaaatGATAATTATTCTTAATTTCagaagcg | yes                       | 13.48           | -127     | Goldberg et al, 1991 |
|                    | <i>vc0771</i> | attaaatGATAATTGTTATTATTTACatccatg | no                        | 12.75           | -163     | Mey et al, 2005      |
|                    | <i>vc0773</i> | aatgtaaGCAAATGTAATCTGTTGCGcttggca | no                        | 5.67            | -62      | Mey et al, 2005      |
|                    | <i>vc0774</i> | tttattaATAAATGCAAGCAATTTCCatttggt | no                        | 9.21            | -76      | Wyckoff et al, 1997  |

|               |                                    |     |       |      |                       |
|---------------|------------------------------------|-----|-------|------|-----------------------|
| <i>vc0775</i> | tcattgtAATATTGATTCTCATTTGttaaag    | no  | 9.38  | -192 | Panina et al, 2001    |
| <i>vc0779</i> | cgctttgCGGAATAAAGAGAATTTTGattgagt  | no  | 6.89  | -47  | Wyckoff et al, 1999   |
| <i>vc0788</i> | cggtcgaAGAAATCGACCTTATTGTGcaaattc  | no  | -2.14 | -96  | Mey et al, 2005       |
| <i>vc1048</i> | cctctttCTTATTGCGAGTGATTCTCaaaaatc  | no  | 10.31 | -71  | Mey et al, 2005       |
| <i>vc1264</i> | cgaaataACAAATGATAATAATTTGCaattcat  | no  | 12.61 | -4   | Mey et al, 2005       |
| <i>vc1264</i> | aacaaatGATAATAATTTGCAATTCatatcaag  | no  | 12.61 | 2    | Mey et al, 2005       |
| <i>vc1264</i> | aaaaattGTAAATTTGTATTATTTGCaccgaaa  | no  | 6.85  | -32  | Mey et al, 2005       |
| <i>vc1265</i> | ttattttTGCAATAAAACCCAATCTCgctttac  | no  | 3.06  | -131 | Mey et al, 2005       |
| <i>vc1548</i> | cttggttGATAATGAGAGCGTTTCTCaatagaa  | no  | 10.74 | -60  | Mey et al, 2005       |
| <i>vc1562</i> | taaaatcGTTAATAAATTTAAATCAAtgctgcg  | no  | 7.14  | -113 | Mey et al, 2005       |
| <i>vc1562</i> | atcggttaATAAATTTAAATCAATGCTgcgcaaa | no  | 7.14  | -109 | Mey et al, 2005       |
| <i>vc1572</i> | agtcggtTGCAATCAGCAGTAATGTGataataa  | no  | 12.78 | -54  | Mey et al, 2005       |
| <i>vc1573</i> | gtaatgtGATAATAATTATCATTTAAataaaga  | no  | 12.49 | -36  | Mey et al, 2005       |
| <i>vc1688</i> | tattgtcGATAATAATTCTCATTCATtgcgcgc  | no  | 11.74 | 5    | Mey et al, 2005       |
| <i>vc1688</i> | gtcgataATAATTCTCATTCATTGCGcgcggtta | no  | 11.74 | 9    | Mey et al, 2005       |
| <i>vc2078</i> | tattaatAGTAATATTTCTTATTAACacttcct  | no  | 8.86  | -42  | Mey et al, 2005       |
| <i>vc2209</i> | tgtaattGATAATGATTATTATTAACtaaaatt  | yes | 14.06 | -88  | Butterton et al, 2000 |

|                                      |                                    |     |       |      |                       |
|--------------------------------------|------------------------------------|-----|-------|------|-----------------------|
| <i>vc2210</i>                        | aaaattgGTTAATGATATACATTCTCatttgaa  | no  | 10.56 | -142 | Butterton et al, 1994 |
| <i>vc2211</i>                        | tcataaatGCAAATGAGAATGCTTTACatttga  | no  | 11.46 | -272 | Butterton et al, 1992 |
| <i>vc2211</i>                        | ttgatttGTGAATTATTAAGATTCTCaatgatg  | no  | 7.45  | -263 | Butterton et al, 1992 |
| <i>vc2694</i>                        | ccagggttGTTAATGATATTAATTATCattaaca | no  | 15.28 | -39  | Mey et al, 2005       |
| <i>vca0063</i>                       | cacaaatGATAATTGATCTTATTTAGatttgtg  | no  | 11.66 | -72  | Mey et al, 2001       |
| <i>vca0216</i>                       | gactatgATAAATGAGAATTAATATCataaaga  | no  | 13.19 | -36  | Mey et al, 2005       |
| <i>vca0227</i>                       | gcactctCTTAATGAGAATAAGTATCaaaatga  | no  | 11.53 | -64  | Panina et al, 2001    |
| <i>vca0232</i>                       | atttaacATATATGCGAATCGTTATCatttgta  | no  | 10.18 | -47  | Panina et al, 2001    |
| <i>vca0576</i>                       | attaaacACAAATGATAGCAATTATCattaata  | no  | 14.74 | -62  | Henderson et al, 1994 |
| <i>vca0625</i>                       | aattattGATAATAATTATCAATTGCatcagta  | no  | 14.58 | 45   | Mey et al, 2005       |
| <i>vca0910</i>                       | cgctaataGATAATGCAATTGATAATTGctatta | no  | 8.27  | -177 | Mey et al, 2005       |
| <i>vca0910</i>                       | aattgacGCTAATGATAATGCAATTGataattg  | no  | 8.27  | -184 | Occhino et al, 1998   |
| <i>vca0969</i>                       | atcactcCCCAATCATTCAAATTTCTcgaatat  | no  | -1.36 | -131 | Mey et al, 2005       |
| <i>vca0976</i>                       | acaaaacGGTAATTATTTGCATTTGAgaataaa  | no  | 9.47  | -66  | Mey et al, 2005       |
| <i>vca0976</i>                       | ttgagaaTAAATTGCATTTAAATATCcctttct  | no  | 3.76  | -44  | Mey et al, 2005       |
| <i>vca1041</i>                       | tttttGAGAATAAATATCAATTAGactgaaact  | no  | 11.35 | -57  | Mey et al, 2005       |
| <i>V. anguillarum</i><br><i>fatD</i> | aatgtaaATCTAAATGATAATCAATGctat     | yes | 8.58  | -310 | Chai et al, 1998      |

|                            |             |                                         |     |        |      |                       |
|----------------------------|-------------|-----------------------------------------|-----|--------|------|-----------------------|
| <i>V. vulnificus</i>       | <i>fatD</i> | caatgctATCACTATTACTCTTGATGtgta          | yes | 2.22   | -289 | Chai et al, 1998      |
|                            | <i>fatD</i> | taaatacATCGTAAACTTAATAAAATtatt          | yes | -0.37  | -354 | Chai et al, 1998      |
|                            | <i>fatD</i> | taaaattATTAACCTTGACGGAAAATGtaaa         | yes | -1.78  | -335 | Chai et al, 1998      |
|                            | <i>huvA</i> | aaacacaAATGATAGTAATTACCATTtagatcc       | no  | 12.82  | -69  | Mouriño et al, 2006   |
|                            | <i>huvX</i> | atcaaAATAAGATCAATTATCAATtgcatta         | no  | -11.23 | -204 | Mouriño et al, 2006   |
|                            | <i>tonB</i> | tgcaaATGATAATGCAATTGATAATTgatctta       | no  | 8.27   | -73  | Mouriño et al, 2006   |
|                            | <i>vuua</i> | caaATGCAAATGAGAATGCTTTACatttaa          | no  | 11.46  | -301 | Webster et al, 1999   |
|                            | <i>hupA</i> | tttacgaATGATAGTAATTATCATTAGCatcca       | no  | 15.68  | -72  | Litwin et al, 1998    |
|                            | <i>sodA</i> | atcaaagttGATAATAATTATCATTAAAGattat      | no  | 13.61  | -54  | Kimoto et al, 2001    |
|                            | <i>vatC</i> | tagagagattGATTATGAAAACAATTCTCattgcaat   | no  | 13.11  | -83  | Tanabe et al, 2005    |
| <i>V. parahaemolyticus</i> | <i>iutA</i> | caaaaaTACAATAATAACGATTCTTatttagatt      | no  | 12.31  | -99  | Tanabe et al, 2005    |
|                            | <i>hupR</i> | atattggatGCTAATGTAATTACTATCattcgtaa     | no  | 3.65   | -175 | Litwin et al, 2001    |
|                            | <i>tonB</i> | ttgaccgtaATGATAATGCAATTGATAATTtagtattaa | no  | 8.27   | -37  | O'Malley et al, 1999  |
|                            | <i>iutA</i> | cgatttGTTATTGATAATAAGTATCattgtcgatt     | no  | 13.75  | -57  | Funahashi et al 2003  |
|                            | <i>sodA</i> | cagttGATAATGATTTTCATTAACattagagt        | no  | 12.88  | -54  | Kimoto et al, 2001    |
|                            | <i>psuA</i> | tattgcaaATGTAAATAATATTTGTTCTTatttctat   | no  | 9.75   | -63  | Funahashi et al, 2001 |
|                            | <i>pvsA</i> | ttagtttGTGTTATTGTTATTTCTGGtttgaa        | no  | 2.11   | -202 | Tanabe et al, 2003    |

*V. mimicus*

|             |                                   |    |       |     |                    |
|-------------|-----------------------------------|----|-------|-----|--------------------|
| <i>sodA</i> | agggttGTTAATGATATTAATTATCatcaacat | no | 15.28 | -92 | Kimoto et al, 2001 |
| <i>iucA</i> | attGATCATGCAAATGATAATAattagcat    | no | 7.72  | -65 | Moon et al, 2004   |
| <i>matC</i> | atGACAATAAAAACAATTATCAttatatt     | no | 13.26 | -81 | Moon et al, 2004   |
