# Supplementary material
Source: publisher figshare collection journal article supplement (https://karger.figshare.com/articles/dataset/_/5120398)
Supplement: Supplementary file 2 [file 1]

**Supplement File 2.** Predicted Fur-regulated genes and operons and the annotated function of the gene products in the 5 sequenced vibrio genomes and the *V. salmonicida* draft genome.

| <i>V. salmonicida</i>                                | Patser score<br>Forward | Patser score<br>Reverse | Distance from<br>translational<br>start to Fur-box | COG(s)                  |
|------------------------------------------------------|-------------------------|-------------------------|----------------------------------------------------|-------------------------|
| <b>Iron Metabolism</b>                               |                         |                         |                                                    |                         |
| pVS320_0029-32-Iron ABC-transporter (Plasmid pVS320) | 12.4/13.7               | 7.4/10.1                | -46                                                | NA                      |
| small regulatory RNA ryhB                            | 12.8/12.9               | 9.1/9.3                 | -20                                                | NA                      |
| (TVS1684-Heme receptor)                              | 10.56/15.684.44         | 5.92/13.56/6.91         | -74                                                | <a href="#">COG1629</a> |
|                                                      |                         |                         |                                                    | <a href="#">COG0635</a> |
|                                                      |                         |                         |                                                    | <a href="#">COG3721</a> |
| TVS1702-00-Putative coproporphyrinogen oxidase PhuW  | 4.54/12.92              | 7.16/5.0/12.37          | -146                                               | <a href="#">COG0748</a> |
|                                                      |                         |                         |                                                    | <a href="#">COG0810</a> |
|                                                      |                         |                         |                                                    | <a href="#">COG0811</a> |
|                                                      |                         |                         |                                                    | <a href="#">COG0848</a> |
|                                                      |                         |                         |                                                    | <a href="#">COG0614</a> |
|                                                      |                         |                         |                                                    | <a href="#">COG0609</a> |
| (TVS1703-09- <i>tonB1</i> -system/heme transporter)  | 7.16/5.0/12.37          | 4.54/12.92              | -65                                                | <a href="#">COG1120</a> |
| TVS1742-Putative iron-regulated protein              | 4.72/4.62/11.99         | 7.40/6.07/13.35         | -82                                                | <a href="#">COG3487</a> |
|                                                      |                         |                         |                                                    | <a href="#">COG1918</a> |
|                                                      |                         |                         |                                                    | <a href="#">COG0370</a> |
| TVS2229-31-Ferrous iron transport protein FeoAB      | 4.93/12.48              | 6.42/11.46/7.06         | -44                                                | -                       |
|                                                      |                         |                         |                                                    | <a href="#">COG1840</a> |
|                                                      |                         |                         |                                                    | <a href="#">COG1178</a> |
| TVS2601-599-Iron(III) ABC transporter FbpABC         | 11.45/6.82              | 6.12/11.924.05          | -52                                                | <a href="#">COG3841</a> |

|                                                          |                 |                 |      |                         |
|----------------------------------------------------------|-----------------|-----------------|------|-------------------------|
|                                                          |                 |                 |      | <a href="#">COG0076</a> |
|                                                          |                 |                 |      | <a href="#">COG3486</a> |
|                                                          |                 |                 |      | -                       |
|                                                          |                 |                 |      | <a href="#">COG1629</a> |
|                                                          |                 |                 |      | <a href="#">COG0614</a> |
|                                                          |                 |                 |      | <a href="#">COG0609</a> |
|                                                          |                 |                 |      | <a href="#">COG0609</a> |
| TVS3255-48 Siderophore biosynthetic enzyme               | 9.59/14.91      | 4.88/15.77/4.69 | -129 | <a href="#">COG1120</a> |
|                                                          |                 |                 |      | -                       |
|                                                          |                 |                 |      | -                       |
|                                                          |                 |                 |      | -                       |
|                                                          |                 |                 |      | <a href="#">COG0811</a> |
|                                                          |                 |                 |      | <a href="#">COG0848</a> |
|                                                          |                 |                 |      | <a href="#">COG0457</a> |
| TVS3559-65-TonB dependent receptor/ <i>tonB2</i> -system | 5.60/13.14      | 11.46           | -74  | <a href="#">COG0457</a> |
|                                                          |                 |                 |      | <a href="#">COG0614</a> |
|                                                          |                 |                 |      | <a href="#">COG0609</a> |
|                                                          |                 |                 |      | <a href="#">COG0609</a> |
| TVS3601-03-Ferrichrome transporter FhuCDB                | 5.25/13.26/4.90 | 12.14/5.84      | -80  | <a href="#">COG1120</a> |
| TVS4198-Ferric aerobactin receptor precursor lutA        | 7.54            | 4.54            | -63  | <a href="#">COG1629</a> |
| (TVS4204-Siderophore biosynthesis protein lucA)          |                 |                 |      | NA                      |

### Energy Metabolism

|                                                |            |            |      |                         |
|------------------------------------------------|------------|------------|------|-------------------------|
| TVS0566-2Fe-2S ferredoxin                      |            |            |      | <a href="#">COG0633</a> |
| TVS0692-Flavodoxin 1                           | 7.16       | 7.43       | -46  | <a href="#">COG0716</a> |
| TVS1372-73-Putative ferredoxin                 | 9.89/14.20 | 6.09/13.35 | -281 | <a href="#">COG1145</a> |
|                                                |            |            |      | <a href="#">COG1132</a> |
| TVS1802-01-Transport ATP-binding protein CydDC | 5.61       | 7.01       | -69  | <a href="#">COG1132</a> |

|                                                     |                |                |      |                         |
|-----------------------------------------------------|----------------|----------------|------|-------------------------|
|                                                     |                |                |      | <a href="#">COG2209</a> |
|                                                     |                |                |      | <a href="#">COG2878</a> |
|                                                     |                |                |      | -                       |
|                                                     |                |                |      | <a href="#">COG1805</a> |
|                                                     |                |                |      | <a href="#">COG2869</a> |
| TVS1837-32-Electron transport complex protein RnfA  |                | 4.93/4.55      | -22  | <a href="#">COG1347</a> |
| TVS1855-Cytochrome d ubiquinol oxidase subunit I    |                |                |      | <a href="#">COG1271</a> |
| TVS1970-Cytochrome c-552 precursor                  | 5.26/9.91      | 4.01/10.51     | -226 | <a href="#">COG3303</a> |
|                                                     |                |                |      | -                       |
|                                                     |                |                |      | <a href="#">COG0437</a> |
|                                                     |                |                |      | <a href="#">COG3301</a> |
|                                                     |                |                |      | <a href="#">COG1138</a> |
|                                                     |                |                |      | <a href="#">COG0526</a> |
| TVS1971-76-Cytochrome c-type protein NrfB precursor | 4.01/10.51     | 5.26/9.91      | -284 | <a href="#">COG3088</a> |
|                                                     |                |                |      | <a href="#">COG1131</a> |
|                                                     |                |                |      | <a href="#">COG2386</a> |
|                                                     |                |                |      | <a href="#">COG0755</a> |
|                                                     |                |                |      | <a href="#">COG3114</a> |
|                                                     |                |                |      | <a href="#">COG2332</a> |
|                                                     |                |                |      | <a href="#">COG1138</a> |
|                                                     |                |                |      | <a href="#">COG0526</a> |
|                                                     |                |                |      | -                       |
| TVS2276-68-Cytochrome biogenesis protein ABCD       | 7.08/7.73/8.22 | 5.75/4.76/4.39 | -142 | -                       |
| TVS3168-Putative ferredoxin                         | 7.3            | 4.81           | -23  | <a href="#">COG0526</a> |
| TVS4048-Putative ferredoxin                         | 6.48           | 5.96           | -7   | <a href="#">COG3217</a> |
|                                                     |                |                |      | <a href="#">COG1622</a> |
|                                                     |                |                |      | <a href="#">COG0843</a> |
|                                                     |                |                |      | <a href="#">COG1845</a> |
|                                                     |                |                |      | <a href="#">COG3125</a> |
| (TVS4328-33-Cytochrome o ubiquinol oxidase)         | 4.95           | 5.88/5.97      | -188 | <a href="#">COG0109</a> |

|                                                          |                     |                |      |                         |
|----------------------------------------------------------|---------------------|----------------|------|-------------------------|
|                                                          |                     |                |      | <a href="#">COG1629</a> |
|                                                          |                     |                |      | <a href="#">COG1120</a> |
|                                                          |                     |                |      | <a href="#">COG0614</a> |
| (TVS4426-22-Ferrioxamine B receptor)                     | 5.46/7.18           | 9.14/7.78      | -55  | <a href="#">COG0609</a> |
| <b>Virulence Factors</b>                                 |                     |                |      |                         |
| (TVS0720-Accessory colonization factor AcfD)             | 8.15/6.21           | 4.72/6.21      | -75  | NA                      |
| (TVS1367-Methyl-accepting chemotaxis protein)            | 7.53                | 4.91/7.93      | -174 | <a href="#">COG0840</a> |
| (TVS1654-Putative hemolysin)                             |                     |                |      | NA                      |
| (TVS1797-Hemolysin HlyA)                                 | 4.05                | 5.03/4.69      | -108 | NA                      |
| TVS1921-Methyl-accepting chemotaxis protein              | 4.27                | 5.22/4.74      | -82  | <a href="#">COG0840</a> |
| TVS2034-Virulence protein VirC                           | 4.96/4.16           | 4.97           | -129 | <a href="#">COG1648</a> |
| TVS2182-Methyl-accepting chemotaxis protein              | 4.43                |                | -99  | <a href="#">COG0840</a> |
|                                                          |                     |                |      | <a href="#">COG1298</a> |
| TVS2288-77-Polar flagellar assembly protein FlhA/FlhH    | 4.77/4.35           | 4.39/7.03/5.98 | -43  | <a href="#">COG1419</a> |
| TVS2327-Flagellin subunit A                              | 5.81/6.30/4.16/7.08 | 6.53/5.56      | -82  | <a href="#">COG1344</a> |
| TVS3342-Methyl-accepting chemotaxis protein              | 4.01/4.61           | 5.47/4.71      | -19  | <a href="#">COG0840</a> |
|                                                          |                     |                |      | <a href="#">COG0845</a> |
|                                                          |                     |                |      | <a href="#">COG3672</a> |
| TVS3429-25-Secretion protein, HlyD family                | 8.82                | 5.06           | -44  | <a href="#">COG2274</a> |
| TVS3458-Hemolysin-type calcium-binding protein           | 5.03                | 5.57           | -215 | NA                      |
| TVS3730-Methyl-accepting chemotaxis protein              | 5.06                | 9.22           | -304 | <a href="#">COG0840</a> |
| TVS3769-Methyl-accepting chemotaxis protein              | 4.74                | 4.67           | -162 | <a href="#">COG0840</a> |
| TVS3926-Hemolysin secretion protein                      | 6.89/5.23           | 5.58/4.79      | -189 | <a href="#">COG0840</a> |
| (TVS4016-Methyl-accepting chemotaxis protein)            |                     |                |      | <a href="#">COG0840</a> |
| TVS4321-Methyl-accepting chemotaxis protein              | 4.91                |                | -117 | <a href="#">COG0840</a> |
| <b>Miscellaneous</b>                                     |                     |                |      |                         |
| TVS0304-Type IV pilus, mannose-sensitive hemagglutinin A | 9.53                | 8.70/6.37      | -151 | NA                      |
| TVS0515-Putative membrane protein                        | 8.35                | 4.92           | -7   | <a href="#">COG2165</a> |

|                                                                       |                 |                |      |                                                                                                          |
|-----------------------------------------------------------------------|-----------------|----------------|------|----------------------------------------------------------------------------------------------------------|
| TVS0535-Glycine cleavage system transcriptional activator             | 8.21/4.84       | 10.66          | -51  | <a href="#">COG0583</a>                                                                                  |
| TVS0540-Conserved hypothetical protein                                | 9.51            | 6.67           | -14  | NA                                                                                                       |
| TVS0658-Copper-transporting P-type ATPase                             |                 |                |      | <a href="#">COG2217</a>                                                                                  |
| TVS0708-07-High-affinity zinc uptake system, atp-binding protein ZnuC | 8.45            | 6.77           | -24  | <a href="#">COG1121</a><br><a href="#">COG1108</a>                                                       |
| TVS0709-High-affinity zinc uptake system protein ZnuA precursor       | 6.77            | 8.45           | -83  | <a href="#">COG0803</a>                                                                                  |
| TVS0742-40-Putative exported protein                                  | 7.47            | 4.25/4.95/8.72 | -19  | NA                                                                                                       |
| TVS0743-Putative exported protein                                     | 8.9             | 10.25          | -49  | NA                                                                                                       |
| TVS0751-Conserved hypothetical protein                                | 11.17           | 5.74/9.49      | -88  | <a href="#">COG1720</a>                                                                                  |
| TVS0843-Membrane permease                                             | 6.71            | 6.06           | -165 | <a href="#">COG2252</a>                                                                                  |
| TVS0934-Putative exported protein                                     | 7.24/4.69       | 5.32           | -38  | NA                                                                                                       |
| TVS0990-Putative exported protein                                     | 5.27/7.73       | 4.29/4.40/9.10 | -33  | NA                                                                                                       |
| TVS1048-Probable protease SohB                                        | 9.86            | 10.12          | -83  | <a href="#">COG0616</a>                                                                                  |
| TVS1078-Transcriptional regulator, AraC-family                        | 7.83            | 5.56/4.49      | -97  | <a href="#">COG2207</a>                                                                                  |
| TVS1113-Putative exported protein                                     | 6.64            |                | -1   | NA                                                                                                       |
| TVS1146-Membrane protein                                              | 5.64/13.24      | 4.33/12.69     | -261 | <a href="#">COG2020</a>                                                                                  |
| TVS1251-Hypothetical protein                                          | 5.55            |                | -125 | NA                                                                                                       |
| TVS1252-L-serine dehydratase 1                                        | 8.05            | 5.17/4.11      | -55  | <a href="#">COG1760</a>                                                                                  |
| TVS1382-HTH-type transcriptional regulator, AraC family               | 4.27/4.97       | 6.46           | -105 | <a href="#">COG2207</a><br><a href="#">COG1132</a><br><a href="#">COG2995</a><br><a href="#">COG3008</a> |
| TVS1472-70-ABC transporter                                            | 4.37/11.57/5.45 | 4.99/11.83     | -19  | <a href="#">COG3008</a>                                                                                  |
| TVS1637-Hypothetical protein                                          | 6.57/8.73       | 7.78/5.49      | 6    | NA                                                                                                       |
| TVS1829-Putative outer membrane protein                               | 15.45           | 4.02/15.09     | -60  | NA                                                                                                       |
| TVS1886-Inner membrane protein                                        | 9.57            | 6.88           | -55  | <a href="#">COG0697</a>                                                                                  |
| TVS1888-Putative membrane protein                                     | 7.58            | 5.23           | -268 | NA                                                                                                       |
| TVS2006-HTH-type transcriptional regulator HexR                       | 7.3/6.14        | 5.94/5.96      | -105 | <a href="#">COG1737</a>                                                                                  |
| TVS2038-FAD linked oxidase                                            |                 |                |      | <a href="#">COG0277</a>                                                                                  |

|                                                         |                 |                 |      |                         |
|---------------------------------------------------------|-----------------|-----------------|------|-------------------------|
|                                                         |                 |                 |      | <a href="#">COG0226</a> |
|                                                         |                 |                 |      | <a href="#">COG0573</a> |
|                                                         |                 |                 |      | <a href="#">COG0581</a> |
| TVS2098-101-Phosphate ABC transporter                   | 4.65/9.63       | 6.53/10.48/7.24 | -161 | <a href="#">COG1117</a> |
| TVS2374-Hypothetical protein                            | 5.01/9.46       | 4.56/10.99      | -35  | NA                      |
| TVS2635-HTH-type luminescence regulator LitR            |                 |                 |      | <a href="#">COG1309</a> |
| TVS2767-50S ribosomal protein L31                       | 4.59/4.66       | 6.62            | -83  | <a href="#">COG0254</a> |
|                                                         |                 |                 |      | <a href="#">COG1053</a> |
|                                                         |                 |                 |      | <a href="#">COG0479</a> |
|                                                         |                 |                 |      | <a href="#">COG3029</a> |
| TVS2812-15-Fumarate reductase flavoprotein              | 9.11            | 10.55/7.11      | -255 | <a href="#">COG3080</a> |
| TVS2877-HTH-type transcriptional regulator, MerR-family | 9.48            | 5.77            | -8   | <a href="#">COG0789</a> |
| TVS2888-Uroporphyrinogen decarboxylase                  |                 |                 |      | <a href="#">COG0407</a> |
| TVS2918-Hypothetical protein                            | 12.46/10.49     | 11.71/5.96      | -39  | <a href="#">COG3315</a> |
| TVS3010-Hypothetical protein/                           |                 |                 |      |                         |
| TVS3011 Zn-dependent peptidase                          | 10.57/6.43      | 9.13            | -17  | NA                      |
| TVS3183-Putative exported protein                       | 8.24/4.53       | 6.91/7.48/5.12  | 14   | NA                      |
| TVS3265-Protein CyaY                                    |                 |                 |      | <a href="#">COG1965</a> |
| TVS3375-Hypothetical protein                            | 7.84            | 5.46            | -128 | NA                      |
| TVS3395-MFS transporter                                 | 7.14/7.77       | 5.61/4.73       | -65  | <a href="#">COG0477</a> |
| (TVS3491-Putative membrane protein)                     |                 |                 |      | <a href="#">COG0672</a> |
| TVS3517-Membrane protein                                | 6.96/13/63/4.56 | 7.42/12.64/7.17 | -64  | NA                      |
| TVS3599-Hypothetical protein                            | 4.90/9.96       | 5.25/12.32      | -79  | NA                      |
| TVS3618-HTH-type transcriptional regulator, AraC-family |                 |                 |      | <a href="#">COG2207</a> |
| TVS3627-Extracellular solute-binding protein            |                 |                 |      | <a href="#">COG1840</a> |
| TVS3703-Manganese-dependent inorganic pyrophosphatase   |                 |                 |      | <a href="#">COG1227</a> |
| TVS3855-MFS transporter                                 |                 |                 |      | <a href="#">COG0477</a> |
| TVS3901-Hypothetical protein                            | 7.47/4.26/5.73  | 6.71/4.39       | -60  | NA                      |
| TVS3985-Hypothetical protein                            | 9.86            | 10.83           | -44  | NA                      |

|                                                              |                |                 |      |                         |
|--------------------------------------------------------------|----------------|-----------------|------|-------------------------|
| TVS4066-Peptidase T                                          | 6.50/5.55      | 9.17/7.24       | -244 | <a href="#">COG2195</a> |
| TVS4118-Hypothetical protein                                 | 4.56/6.62      | 4.46/6.68       | -202 | NA                      |
| TVS4132-Membrane protein                                     | 7.69/4.94      | 6.9             | -71  | <a href="#">COG3217</a> |
| TVS4161-60-Putative exported protein                         | 10.01/4.97/5.0 | 10.00/7.33/6.46 | -151 | NA                      |
| TVS4187-Putative exported protein                            | 8.35           | 7.81            | -166 | NA                      |
| TVS4235-Putative exported protein                            | 5.19/9.85      | 6.53/4.01/7.16  | -120 | NA                      |
| TVS4310-Divalent cation transporter, putative Mg transporter | 4.80/7.79      | 6.92            | -61  | <a href="#">COG2239</a> |
| TVS4348-ATP-dependent protease LA-related protein            | 6.73/4.90      | 6.00/5.23       | -179 | <a href="#">COG1067</a> |
| TVS4378-Hypothetical protein                                 | 9.07/8.60      | 8.51/8.70       | -81  | <a href="#">COG3016</a> |
| TVS4394-Cell aggregate formation protein, BsmA               | 4.98/9.47      | 7.16/8.73       | -83  | NA                      |
| TVS4439-Response regulator protein                           | 6.93           | 4.19/4.39       | -4   | NA                      |

---

### ***V. cholerae***

---

#### **Iron Metabolism**

|                                                                           |                 |                 |      |                         |
|---------------------------------------------------------------------------|-----------------|-----------------|------|-------------------------|
| small regulatory RNA ryhB <sup>#</sup>                                    | 12.16/13.45     | 11.60/13.04     | -29  | NA                      |
| VCA0576-Heme transport protein Huta <sup>#</sup>                          | 7.70/14.74/8.04 | 6.89/11.67/7.96 | -62  | <a href="#">COG1629</a> |
| VCA0909-07-Oxygen-independent coproporphyrinogen III oxidase <sup>#</sup> | 11.88           | 9.26/8.27       | -106 | <a href="#">COG0635</a> |
|                                                                           |                 |                 |      | <a href="#">COG3721</a> |
|                                                                           |                 |                 |      | <a href="#">COG0748</a> |
|                                                                           |                 |                 |      | <a href="#">COG0810</a> |
|                                                                           |                 |                 |      | <a href="#">COG0811</a> |
|                                                                           |                 |                 |      | <a href="#">COG0848</a> |
|                                                                           |                 |                 |      | <a href="#">COG0614</a> |
|                                                                           |                 |                 |      | <a href="#">COG0609</a> |
| VCA0910-15- <i>tonB1</i> -system/heme transporter <sup>#</sup>            | 8.27/9.26       | 11.88           | -177 | <a href="#">COG1120</a> |
| VC1264-Iron-regulated protein A <sup>#</sup>                              | 6.85/12.61      | 4.70/4.73/13.28 | -4   | <a href="#">COG3487</a> |
|                                                                           |                 |                 |      | <a href="#">COG1918</a> |
|                                                                           |                 |                 |      | <a href="#">COG0370</a> |
| VC2078-76-Ferrous iron transport protein AB <sup>#</sup>                  | 6.57/8.86/4.51  | 6.18/4.57       | -42  | -                       |

|                                                                                |                           |                         |            |                         |
|--------------------------------------------------------------------------------|---------------------------|-------------------------|------------|-------------------------|
|                                                                                |                           |                         |            | <a href="#">COG1840</a> |
|                                                                                |                           |                         |            | <a href="#">COG1178</a> |
| VC0608-10-Iron(III) ABC transporter <sup>#</sup>                               | 10.09                     | 10.94                   | 5          | <a href="#">COG3841</a> |
| VC0123-CyaY Protein implicated in iron transport                               | 7.85                      | 5.21                    | 3          | <a href="#">COG1965</a> |
|                                                                                |                           |                         |            | -                       |
|                                                                                |                           |                         |            | -                       |
|                                                                                |                           |                         |            | -                       |
|                                                                                |                           |                         |            | <a href="#">COG0811</a> |
|                                                                                |                           |                         |            | <a href="#">COG0848</a> |
| VC0284/VC1548-43-TonB dependent receptor/<br><i>tonB2</i> -system <sup>#</sup> | 5.21/12.84/5.24<br>10.740 | 15.06/4.78<br>6.250     | -95<br>-60 | <a href="#">COG0457</a> |
|                                                                                |                           |                         |            | <a href="#">COG0457</a> |
|                                                                                |                           |                         |            | <a href="#">COG0614</a> |
|                                                                                |                           |                         |            | <a href="#">COG0609</a> |
|                                                                                |                           |                         |            | <a href="#">COG0609</a> |
| VCA0227-30-Iron(III) ABC transporter <sup>#</sup>                              | 11.53/6.52                | 11.33/6.72              | 29         | <a href="#">COG1120</a> |
| VCA0685-Iron(III) ABC transporter                                              | 7.33                      | 9.20                    | -117       | <a href="#">COG1840</a> |
|                                                                                |                           |                         |            | <a href="#">COG1629</a> |
|                                                                                |                           |                         |            | <a href="#">COG1120</a> |
|                                                                                | 6.82/8.36/7.22/<br>10.35  | 9.43/5.98/4.83/<br>8.49 | -26        | <a href="#">COG0614</a> |
| VC0200-03-Iron(III) compound receptor <sup>#</sup>                             |                           |                         |            | <a href="#">COG0609</a> |
| VCA0686-Iron(III) ABC transporter                                              |                           |                         |            | <a href="#">COG1178</a> |
| VC0199-Ferrichrome-iron receptor A                                             | 4.83/5.98/9.43            | 7.22/8.36               | -37        | <a href="#">COG1132</a> |
|                                                                                |                           |                         |            | <a href="#">COG2906</a> |
| VC0364-65-Bacterioferritin Bfd-Bfr <sup>#</sup>                                | 10.35                     | 5.76                    | -56        | <a href="#">COG2193</a> |
| VC0771-Vibriobactin-specific isochorismatase VibB <sup>#</sup>                 | 12.75                     | 13.97                   | -163       | NA                      |
| VC0773-72-Vibriobactin-specific isochorismate synthase                         |                           |                         |            | <a href="#">COG1169</a> |
| VibC-VibE <sup>#</sup>                                                         | 6.12/12.88/5.67           | 9.21/12.28              | -62        | <a href="#">COG1021</a> |
| VC0474-Iron-regulated virulence regulatory protein IrgB <sup>#</sup>           | 13.48                     | 13.80                   | -127       | <a href="#">COG0583</a> |
| VC0475-Iron-regulated outer membrane                                           |                           |                         |            |                         |



|                                                                       |                      |                 |      |                         |
|-----------------------------------------------------------------------|----------------------|-----------------|------|-------------------------|
| virulence protein IrgA <sup>#</sup>                                   | 13.80                | 13.48           | -33  | <a href="#">COG1629</a> |
| VC0774-Vibriobactin-specific dehydrogenase VibA <sup>**</sup>         | 9.21/12.28           | 6.12/12.88/5.67 | -76  | <a href="#">COG1028</a> |
| VC0775-Vibriobactin synthesis protein VibH <sup>**</sup>              | 10.98/4.82/9.38      | 8.97/8.62       | -192 | <a href="#">COG1020</a> |
|                                                                       |                      |                 |      | <a href="#">COG0614</a> |
|                                                                       |                      |                 |      | <a href="#">COG0609</a> |
| No/VC0776-78-Ferric vibriobactin ABC transporter ViuPDG <sup>**</sup> | 8.62/8.97            | 9.38/4.82/10.98 | -1   | <a href="#">COG0609</a> |
| VC0779-81 Ferric vibriobactin ABC transporter <sup>#</sup>            | 6.89                 |                 | -34  | <a href="#">COG1120</a> |
| VC2210-Vibriobactin utilization protein ViuB <sup>**</sup>            | 10.56                | 12.64           | -142 | <a href="#">COG2375</a> |
| VC2211-Vibriobactin receptor ViuA <sup>#</sup>                        | 6.59/11.46/7.45/5.60 | 10.74/7.03/8.01 | -272 | <a href="#">COG1629</a> |
|                                                                       |                      |                 |      | <a href="#">COG1770</a> |
|                                                                       |                      |                 |      | <a href="#">COG1629</a> |
|                                                                       |                      |                 |      | -                       |
|                                                                       |                      |                 |      | -                       |
| VCA0063-67-Protease II PrtB/Haem receptor HutR <sup>#</sup>           | 11.66                | 12.40           | -72  | -                       |
| VCA0232-Enterobactin receptor VctA <sup>#</sup>                       | 10.180               | 11.72/6.59      | -47  | NA                      |
| VCA0575-Transcriptional regulator, LysR family HupR <sup>3</sup>      | 7.96/11.67/6.89      | 8.04/14.74/7.70 | -177 | <a href="#">COG0583</a> |
| <b>Energy Metabolism</b>                                              |                      |                 |      |                         |
| VC0753-Ferredoxin                                                     |                      |                 |      | <a href="#">COG0633</a> |
| VC2099- Flavodoxin                                                    |                      |                 |      | <a href="#">COG0716</a> |
| VC1516-Iron-sulfur cluster-binding protein <sup>#</sup>               | 6.45                 | 7.95            | -109 | <a href="#">COG1145</a> |
|                                                                       |                      |                 |      | <a href="#">COG1132</a> |
| VC1181-80-Transport ATP-binding protein CydDC                         | 8.15                 | 7.77            | -32  | <a href="#">COG1132</a> |

|                                                      |           |      |      |                         |
|------------------------------------------------------|-----------|------|------|-------------------------|
|                                                      |           |      |      | <a href="#">COG2209</a> |
|                                                      |           |      |      | <a href="#">COG2878</a> |
|                                                      |           |      |      | -                       |
|                                                      |           |      |      | <a href="#">COG1805</a> |
|                                                      |           |      |      | <a href="#">COG2869</a> |
|                                                      |           |      |      | <a href="#">COG1347</a> |
|                                                      |           |      |      | <a href="#">COG0177</a> |
| VC1017-10-Electron transport complex protein RnfB    | 5.61      | 5.30 | -290 | <a href="#">COG0346</a> |
| VC1844-Cytochrome d ubiquinol oxidase, subunit I     |           |      |      | <a href="#">COG1271</a> |
|                                                      |           |      |      | <a href="#">COG1131</a> |
|                                                      |           |      |      | <a href="#">COG2386</a> |
|                                                      |           |      |      | <a href="#">COG0755</a> |
|                                                      |           |      |      | <a href="#">COG3114</a> |
|                                                      |           |      |      | <a href="#">COG2332</a> |
|                                                      |           |      |      | <a href="#">COG1138</a> |
|                                                      |           |      |      | <a href="#">COG0526</a> |
|                                                      |           |      |      | -                       |
|                                                      |           |      |      | -                       |
| VC2057-48-Cytochrome biogenesis protein ABCD         | 6.62/6.67 | 5.71 | -310 | <a href="#">COG2853</a> |
| VC2241-Cytochrome c554                               | 4.94      |      | 20   | <a href="#">COG2863</a> |
| <b>Virulence Factors</b>                             |           |      |      |                         |
| VC0857-Fimbrial assembly protein Pile                | 4.85/6.66 | 5.40 | -1   | <a href="#">COG2165</a> |
| VCA1069-Methyl-accepting chemotaxis protein          | 4.96      | 4.79 | -1   | <a href="#">COG0840</a> |
| VC0838-TCP pilus virulence regulatory protein        |           |      |      | <a href="#">COG2207</a> |
| VCA0219-Hemolysin precursor HlyA                     | 5.19      |      | -164 | NA                      |
| VCA0219-Haemolysin                                   | 5.19      |      | -164 | NA                      |
| VC1859-Methyl-accepting chemotaxis protein           | 4.60      | 4.62 | -199 | <a href="#">COG0840</a> |
|                                                      |           |      |      | <a href="#">COG1298</a> |
| VC2069-68-Polar flagellar assembly protein FlhA/FlhH |           |      |      | <a href="#">COG1419</a> |

|                                                                     |                |       |      |                         |
|---------------------------------------------------------------------|----------------|-------|------|-------------------------|
| VC2188-Flagellin A                                                  |                |       |      | <a href="#">COG1344</a> |
| VCA0988-Methyl-accepting chemotaxis protein*                        | 5.19           | 5.30  | -65  | <a href="#">COG0840</a> |
| VC1618-Multidrug resistance protein                                 |                |       |      | <a href="#">COG0477</a> |
|                                                                     |                |       |      | <a href="#">COG0845</a> |
|                                                                     |                |       |      | <a href="#">COG3672</a> |
|                                                                     |                |       |      | -                       |
|                                                                     |                |       |      | <a href="#">COG2200</a> |
| VCA1080-84-Type I secretion, HlyD family                            |                |       |      | <a href="#">COG2274</a> |
| VCA0068-Methyl-accepting chemotaxis protein*                        | 11.60/4.99     | 10.27 | -40  | <a href="#">COG0840</a> |
| VCA0176-Methyl-accepting chemotaxis protein                         |                |       |      | <a href="#">COG0840</a> |
| VC1403-Methyl-accepting chemotaxis protein*                         | 5.14           | 5.70  | -135 | <a href="#">COG0840</a> |
| VC0825-Toxin co-regulated pilus biosynthesis protein I <sup>#</sup> | 7.91           | 6.33  | -1   | <a href="#">COG0840</a> |
| VC1313-Methyl-accepting chemotaxis protein                          |                |       |      | <a href="#">COG0840</a> |
| VCA0219-Hemolysin precursor HlyA                                    | 5.19           |       | -164 | NA                      |
| VC0825-Methyl-accepting chemotaxis protein* <sup>#</sup>            | 7.91           | 6.33  | -1   | <a href="#">COG0454</a> |
| VC0826-Methyl-accepting chemotaxis protein*                         | 5.31/4.87/6.67 | 4.70  | -191 | <a href="#">COG0745</a> |
| VC1643-Methyl-accepting chemotaxis protein*                         | 5.60           | 6.08  | -1   | <a href="#">COG0840</a> |
| VCA0923-Methyl-accepting chemotaxis protein*                        | 5.17           |       | 44   | <a href="#">COG0840</a> |

### Miscellaneous

|                                                                   |           |      |     |                         |
|-------------------------------------------------------------------|-----------|------|-----|-------------------------|
| VC0409-Type IV pilus, mannose-sensitive hemagglutinin A           |           |      |     | NA                      |
| VC0896-Transcriptional regulator, LysR family                     | 5.68      |      | -49 | <a href="#">COG0583</a> |
| VC0900-Conserved hypothetical protein                             |           |      |     | NA                      |
| VC2215-Copper-transporting P-type ATPase                          |           |      |     | <a href="#">COG2217</a> |
| VC1917-Hypothetical protein                                       |           |      |     | <a href="#">COG1555</a> |
| VC0992-Glutathione-regulated potassium-efflux system protein KefB |           |      |     | <a href="#">COG0475</a> |
|                                                                   |           |      |     | <a href="#">COG1121</a> |
| VC2082-83-Zinc ABC transporter                                    | 4.68      | 5.26 | -21 | <a href="#">COG1108</a> |
| VC2081-Zinc ABC transporter                                       | 5.26/5.19 | 4.68 | -72 | <a href="#">COG0803</a> |

|                                                         |                 |                 |      |                         |
|---------------------------------------------------------|-----------------|-----------------|------|-------------------------|
| VC0845-Conserved hypothetical protein <sup>#</sup>      | 6.21            |                 | -292 | NA                      |
| VC0876-Hypothetical protein                             | 5.12/7.32       | 9.97            | 21   | <a href="#">COG1720</a> |
| VC2278-Hypothetical protein                             |                 |                 |      | <a href="#">COG2252</a> |
| VC1060-SohB protein, peptidase U7 family                |                 |                 |      | <a href="#">COG0616</a> |
| VCA1001-Transcriptional regulator, AraC-family          |                 |                 |      | <a href="#">COG2207</a> |
| VC1199-Hypothetical protein                             |                 |                 |      | <a href="#">COG2020</a> |
| VC2212-Hypothetical protein                             | 8.01/7.03/10.74 | 5.60/7.45/11.46 | -149 | NA                      |
| VC1300-L-serine dehydratase 1                           | 6.11            |                 | -8   | <a href="#">COG1760</a> |
|                                                         |                 |                 |      | <a href="#">COG1132</a> |
|                                                         |                 |                 |      | <a href="#">COG2995</a> |
| VC1499-501-ABC transporter                              | 5.06/7.91       | 7.79/9.16       | -14  | <a href="#">COG3008</a> |
| VC1189-Hypothetical protein                             |                 |                 |      | NA                      |
| VC1009-Hypothetical protein                             | 12.65           | 10.17           | -52  | NA                      |
| VC0075-MadN protein                                     |                 |                 |      | <a href="#">COG0697</a> |
| VC1148-Hypothetical protein                             |                 |                 |      | <a href="#">COG1737</a> |
| VC1363-Siroheme synthase component enzyme               |                 |                 |      | <a href="#">COG1648</a> |
| VC1198-Hypothetical protein                             |                 |                 |      | <a href="#">COG0277</a> |
|                                                         |                 |                 |      | <a href="#">COG0226</a> |
|                                                         |                 |                 |      | <a href="#">COG0573</a> |
|                                                         |                 |                 |      | <a href="#">COG0581</a> |
| VCA0070-73-Phosphate ABC transporter <sup>*</sup>       | 10.27           | 11.60           | -270 | <a href="#">COG1117</a> |
| VC2149-Hypothetical protein                             |                 |                 |      | NA                      |
| VC0878-Ribosomal protein L31                            | 9.97            | 7.32/5.12       | -60  | <a href="#">COG0254</a> |
|                                                         |                 |                 |      | <a href="#">COG1053</a> |
|                                                         |                 |                 |      | <a href="#">COG0479</a> |
|                                                         |                 |                 |      | <a href="#">COG3029</a> |
| VC2656-59-Fumarate reductase, flavoprotein              |                 |                 |      | <a href="#">COG3080</a> |
| VC0277-Transcriptional regulator, MerR family           |                 |                 |      | <a href="#">COG0789</a> |
| VC0332-Uroporphyrinogen decarboxylase (HemE)            | 8.94            |                 | -165 | <a href="#">COG0407</a> |
| VC0091-O-methyltransferase-related protein <sup>#</sup> | 9.10            | 10.44           | 14   | <a href="#">COG3315</a> |

|                                                                                          |                 |            |      |                         |
|------------------------------------------------------------------------------------------|-----------------|------------|------|-------------------------|
| VC0036-FixG-related protein                                                              |                 |            |      | <a href="#">COG0526</a> |
| VC1688-Hypothetical protein <sup>#</sup>                                                 | 8.97/11.74      | 8.66/9.11  | 5    | NA                      |
| VCA0231-Transcriptional regulator, AraC/XylS family <sup>#</sup>                         | 11.72/6.59      | 10.18      | -1   | <a href="#">COG2207</a> |
| VC1687-Hypothetical protein                                                              | 8.66            | 8.97       | -141 | <a href="#">COG1227</a> |
| VCA0554-Oxalate/formate antiporter                                                       | 6.03            |            | -1   | <a href="#">COG0477</a> |
| VCA0924-Hypothetical protein                                                             |                 |            |      | <a href="#">COG3217</a> |
| VCA0180-Peptidase T                                                                      |                 |            |      | <a href="#">COG2195</a> |
| VCA0818-Putative magnesium transporter                                                   |                 |            |      | <a href="#">COG2239</a> |
| VCA0975-ATP-dependent protease LA-related protein                                        | 9.47/9.70       | 8.15/10.02 | -52  | <a href="#">COG1067</a> |
| VC2004-Conserved hypothetical protein                                                    | 10.55           | 8.28       | -21  | <a href="#">COG3016</a> |
| VC1183-Hypothetical protein                                                              |                 |            |      | NA                      |
| VC0139-Ferritin-like DNA-binding protein                                                 | 7.44            | 5.02       | -1   | <a href="#">COG0783</a> |
| VC0617-Peptide ABC transporter, ATP-binding protein                                      |                 |            |      | <a href="#">COG0444</a> |
| VC2275-Transcriptional regulator Crl                                                     |                 |            |      | NA                      |
| VCA0070-Phosphate ABC transporter                                                        |                 |            |      | <a href="#">COG0226</a> |
| VCA0075-Hypothetical protein                                                             | 6.95            | 5.07       | -198 | NA                      |
| VCA0676-Iron-sulfur cluster-binding protein NapF <sup>#</sup>                            |                 |            |      | <a href="#">COG1145</a> |
| VCA0976-77-Hypothetical protein and ABC transporter,<br>ATP-binding protein <sup>#</sup> | 9.47/9.70       | 8.15/10.02 | -66  | <a href="#">COG1123</a> |
| VCA1048-Oxidoreductase                                                                   | 6.05            | 6.39       | -1   | <a href="#">COG0673</a> |
| VC1048 Hypothetical protein <sup>#</sup>                                                 | 10.31           | 6.55       | -71  | <a href="#">COG0778</a> |
| VC1562 Beta-lactamase-related protein                                                    | 7.14            |            | -116 | <a href="#">COG0491</a> |
| VC2209-Non-ribosomal peptide synthetase VibF <sup>**</sup>                               | 6.64/14.06/4.89 | 5.26/12.66 | -88  | <a href="#">COG1020</a> |
| VC2694-Superoxide dismutase SodA <sup>**</sup>                                           | 7.22/15.28/6.12 | 15.09/8.31 | -39  | <a href="#">COG0605</a> |
| VCA0216-Hypothetical protein <sup>#</sup>                                                | 13.19           | 13.44      | -36  | NA                      |
| VCA1041-Putative phosphomannomutase <sup>#</sup>                                         | 11.35           | 11.23      | -57  | <a href="#">COG1109</a> |
| VC1572-73-Hypothetical protein and fumarate hydratase <sup>#</sup>                       | 12.49           | 12.23      | -54  | <a href="#">COG0114</a> |

---

***V. parahaemolyticus***

---

**Iron Metabolism**

|                                                                     |                                  |                                  |            |                                                                                                                                                                |
|---------------------------------------------------------------------|----------------------------------|----------------------------------|------------|----------------------------------------------------------------------------------------------------------------------------------------------------------------|
| small regulatory RNA ryhB <sup>4</sup>                              | 12.16/13.70<br>6.34/11.02/12.04/ | 11.60/14.81<br>6.21/12.01/12.03/ | -29        | NA                                                                                                                                                             |
| VPA0882-Heme transport protein HutA                                 | 7.40                             | 7.74/5.08                        | -80        | <a href="#">COG1629</a><br><a href="#">COG0635</a><br><a href="#">COG3721</a>                                                                                  |
| VPA0427-29-Coproporphyrinogen oxidase homolog PhuW                  | 9.16/5.11/8.03                   | 5.59/6.52/7.52                   | -108       | <a href="#">COG0748</a><br><a href="#">COG0810</a><br><a href="#">COG0811</a><br><a href="#">COG0848</a><br><a href="#">COG0614</a><br><a href="#">COG0609</a> |
| VPA0426-21- <i>tonB1</i> -system/heme transporter                   | 5.59/6.52/7.52                   | 9.16/5.11/8.03                   | -75        | <a href="#">COG1120</a>                                                                                                                                        |
| VP1920-Putative iron-regulated protein A                            | 10.62                            | 8.04/7.28                        | -32        | <a href="#">COG3487</a><br><a href="#">COG1918</a><br><a href="#">COG0370</a>                                                                                  |
| VP0857-59-Ferrous iron transport protein AB                         | 11.62/9.53                       | 7.87/12.06                       | -41        | -<br><a href="#">COG1840</a><br><a href="#">COG1178</a>                                                                                                        |
| VP2491-89-Iron(III) ABC transporter                                 | 8.34/7.34                        | 9.50/5.96                        | -39        | <a href="#">COG3841</a><br>-<br>-<br>-                                                                                                                         |
| VPA1657/VPA0150-56-TonB dependent receptor/<br><i>tonB2</i> -system | 9.75/6.60<br>6.07/10.70/7.58     | 11.05/6.08<br>8.75/5.80          | -59<br>-97 | <a href="#">COG0811</a><br><a href="#">COG0848</a><br><a href="#">COG0457</a><br><a href="#">COG0457</a>                                                       |

|                                                                       |                 |                 |      |                         |
|-----------------------------------------------------------------------|-----------------|-----------------|------|-------------------------|
|                                                                       |                 |                 |      | <a href="#">COG0614</a> |
|                                                                       |                 |                 |      | <a href="#">COG0609</a> |
|                                                                       |                 |                 |      | <a href="#">COG0609</a> |
| VPA0657-60-Iron(III) ABC transporter                                  | 8.23            | 9.83            | -32  | <a href="#">COG1120</a> |
| VPA0979-Ferric aerobactin receptor precursor <sup>1</sup>             | 12.34/9.20      | 6.50/12.75      | -54  | <a href="#">COG1629</a> |
|                                                                       |                 |                 |      | <a href="#">COG1629</a> |
|                                                                       |                 |                 |      | <a href="#">COG1120</a> |
|                                                                       |                 |                 |      | <a href="#">COG0614</a> |
| VPA1435-38-Putative iron(III) compound receptor                       | 11.60           | 12.84/6.59      | -56  | <a href="#">COG0609</a> |
| VP2769-68-Bacterioferritin-associated ferredoxin/<br>Bacterioferritin | 6.29            | 6.66/7.08       | -64  | <a href="#">COG2906</a> |
| VP2603-Iron-regulated virulence regulatory protein homolog            | 13.04/10.46     | 8.02/13.85      | -123 | <a href="#">COG2193</a> |
| VP2602-Iron-regulated outer membrane<br>virulence protein homolog     | 8.02/13.85      | 13.04/10.46     | -33  | <a href="#">COG0583</a> |
|                                                                       |                 |                 |      | <a href="#">COG1629</a> |
|                                                                       |                 |                 |      | <a href="#">COG0614</a> |
|                                                                       |                 |                 |      | <a href="#">COG0609</a> |
| VPA1657-1652-Ferric siderophore receptor                              | 7.63/8.13       | 7.23/6.59/5.40  | -65  | <a href="#">COG0609</a> |
| VPA0089-Putative siderophore utilization protein                      | 7.43/8.59       | 5.67/8.44       | -35  | <a href="#">COG2375</a> |
|                                                                       |                 |                 |      | <a href="#">COG1770</a> |
|                                                                       |                 |                 |      | <a href="#">COG1629</a> |
|                                                                       |                 |                 |      | -                       |
|                                                                       |                 |                 |      | -                       |
| VPA1467-63-Protease II/Putative TonB system receptor                  | 8.21/11.26/6.31 | 12.33/7.56/5.46 | -79  | -                       |
| <b>Energy Metabolism</b>                                              |                 |                 |      |                         |
| VP0601-Ferredoxin                                                     |                 |                 |      | <a href="#">COG0633</a> |
| VP0835-Flavodoxin 1                                                   |                 |                 |      | <a href="#">COG0716</a> |
|                                                                       |                 |                 |      | <a href="#">COG1132</a> |
| VP1250-49-Transport ATP-binding protein CydDC                         | 8.17            | 8.46            | -30  | <a href="#">COG1132</a> |
| VP1053-Cytochrome d ubiquinol oxidase, subunit I                      |                 |                 |      | <a href="#">COG1271</a> |

|                                                      |           |           |      |                         |
|------------------------------------------------------|-----------|-----------|------|-------------------------|
| VP1929-Nitrite reductase periplasmic cytochrome c552 | 8.42      | 7.35/6.67 | -354 | <a href="#">COG3303</a> |
|                                                      |           |           |      | <a href="#">COG0437</a> |
|                                                      |           |           |      | <a href="#">COG3301</a> |
|                                                      |           |           |      | <a href="#">COG1138</a> |
|                                                      |           |           |      | <a href="#">COG0526</a> |
| VP1928-23-Cytochrome c-type protein NrfB precursor   | 7.35/6.67 | 8.42      | -139 | <a href="#">COG3088</a> |
|                                                      |           |           |      | <a href="#">COG1131</a> |
|                                                      |           |           |      | <a href="#">COG2386</a> |
|                                                      |           |           |      | <a href="#">COG0755</a> |
|                                                      |           |           |      | <a href="#">COG3114</a> |
|                                                      |           |           |      | <a href="#">COG2332</a> |
|                                                      |           |           |      | <a href="#">COG1138</a> |
|                                                      |           |           |      | <a href="#">COG0526</a> |
| VP2223-15-Cytochrome biogenesis protein ABCD         | 5.09      |           | -138 | -                       |
|                                                      |           |           |      | -                       |
|                                                      |           |           |      | <a href="#">COG1622</a> |
|                                                      |           |           |      | <a href="#">COG0843</a> |
|                                                      |           |           |      | <a href="#">COG1845</a> |
|                                                      |           |           |      | <a href="#">COG3125</a> |
| VPA0627-31-Cytochrome o ubiquinol oxidase            |           |           |      | <a href="#">COG0109</a> |
| VP2300-Cytochrome c554                               |           |           |      | <a href="#">COG2863</a> |

### Virulence Factors

|                                                      |       |       |      |                         |
|------------------------------------------------------|-------|-------|------|-------------------------|
| VP0656-Putative fimbrial assembly protein            |       |       |      | <a href="#">COG2165</a> |
| VPA1651-Methyl-accepting chemotaxis protein          | 12.04 | 11.04 | -308 | <a href="#">COG0840</a> |
| VP1981-Methyl-accepting chemotaxis protein           | 6.01  | 6.01  | -301 | <a href="#">COG0840</a> |
| VP1088-Methyl-accepting chemotaxis protein           | 6.44  |       | -125 | <a href="#">COG0840</a> |
|                                                      |       |       |      | <a href="#">COG1298</a> |
| VP2235-34-Polar flagellar assembly protein FlhA/FlhH |       |       |      | <a href="#">COG1419</a> |



|                                                          |                 |                 |      |                         |
|----------------------------------------------------------|-----------------|-----------------|------|-------------------------|
| VP0788-Polar flagellin C                                 |                 |                 |      | <a href="#">COG1344</a> |
| VPA0596-Putative methyl-accepting chemotaxis protein     |                 |                 |      | <a href="#">COG0840</a> |
| VP1315-Multidrug resistance protein                      |                 |                 |      | <a href="#">COG0477</a> |
|                                                          |                 |                 |      | <a href="#">COG0845</a> |
|                                                          |                 |                 |      | <a href="#">COG3672</a> |
| VPA1733-36-Type I secretion, HlyD family                 |                 |                 |      | <a href="#">COG2274</a> |
| VP1633-Putative RTX toxin                                | 5.6             | 5.75            | -45  | NA                      |
|                                                          | 5.56/5.70/5.78/ | 6.36/7.21/9.34/ |      |                         |
| VPA1462-Methyl-accepting chemotaxis protein              | 5.61/7.78/7.92  | 6.10/6.27       | -39  | <a href="#">COG0840</a> |
| VP0963-Methyl-accepting chemotaxis protein               |                 |                 |      | <a href="#">COG0840</a> |
| VPA1000-Methyl-accepting chemotaxis protein              |                 |                 |      | <a href="#">COG0840</a> |
| VPA1434-Putative hemolysin secretion ATP-binding protein | 12.84/6.59      | 11.66           | -108 | <a href="#">COG1132</a> |
|                                                          | 5.56/5.70/5.78/ | 6.36/7.21/9.34/ |      |                         |
| VPA1462-Methyl-accepting chemotaxis protein              | 5.61/7.78/7.92  | 6.10/6.27       | -40  | <a href="#">COG0454</a> |
| VPA1332-Methyl-accepting chemotaxis protein              |                 |                 |      | <a href="#">COG0745</a> |
| VPA1651-Methyl-accepting chemotaxis protein              | 12.04           | 11.04           | -308 | <a href="#">COG0840</a> |
| VPA0511-Methyl-accepting chemotaxis protein              |                 |                 |      | <a href="#">COG0840</a> |

### Miscellaneous

|                                                         |           |          |      |                         |
|---------------------------------------------------------|-----------|----------|------|-------------------------|
| VP2698-Type IV pilus, mannose-sensitive hemagglutinin A |           |          |      | NA                      |
| VP0692-Transcriptional regulator LysR family            |           |          |      | <a href="#">COG0583</a> |
| VP0699-Conserved hypothetical protein                   |           |          |      | NA                      |
| VP0758-Cation transport ATPase                          | 6.05      |          | -319 | <a href="#">COG2217</a> |
| VP0922-Hypothetical protein                             |           |          |      | <a href="#">COG1555</a> |
| VP0827-Glutathione-regulated potassium-efflux system    | 8.45      | 8.86     | -1   | <a href="#">COG0475</a> |
|                                                         |           |          |      | <a href="#">COG1121</a> |
| VP0852-51-Zinc ABC transporter                          | 7.02      | 8.36     | -20  | <a href="#">COG1108</a> |
| VP0853-Zinc ABC transporter                             | 8.36      | 7.02     | -77  | <a href="#">COG0803</a> |
| VPA1376-Conserved hypothetical protein                  |           |          |      | NA                      |
| VP2332-Conserved hypothetical protein                   | 6.65/9.48 | 9.7/5.97 | -81  | <a href="#">COG1720</a> |

|                                                |                 |                          |      |                                                                                                                                                                                                |
|------------------------------------------------|-----------------|--------------------------|------|------------------------------------------------------------------------------------------------------------------------------------------------------------------------------------------------|
| VP0672-Hypothetical protein                    |                 |                          |      | <a href="#">COG2252</a>                                                                                                                                                                        |
| VP2126-Hypothetical protein                    |                 |                          |      | NA                                                                                                                                                                                             |
| VP2032-SohB protein, peptidase U7 family       |                 |                          |      | <a href="#">COG0616</a>                                                                                                                                                                        |
| VPA0531-Transcriptional regulator, AraC-family | 4.90/7.14       | 8.64/6.75                | -79  | <a href="#">COG2207</a>                                                                                                                                                                        |
| VP1271-Hypothetical protein                    |                 |                          |      | <a href="#">COG2020</a>                                                                                                                                                                        |
| VP0766-Conserved hypothetical protein          | 6.30            | 5.95                     | -55  | NA                                                                                                                                                                                             |
| VP1880-L-serine dehydratase 1                  | 7.17            | 5.36                     | -7   | <a href="#">COG1760</a>                                                                                                                                                                        |
| VP1510-Iron-sulfur cluster-binding protein     |                 |                          |      | <a href="#">COG1145</a>                                                                                                                                                                        |
| VP0377-Putative CFA/I fimbrial subunit D       | 5.02/11.82/6.15 | 6.75/6.30/10.09/<br>5.93 | -270 | <a href="#">COG2207</a><br><a href="#">COG1132</a><br><a href="#">COG2995</a><br><a href="#">COG3008</a>                                                                                       |
| VP1609-11-ABC transporter                      | 7.73            | 5.61/6.57                | -23  | <a href="#">COG3008</a>                                                                                                                                                                        |
| VP1261-Hypothetical protein                    |                 |                          |      | NA                                                                                                                                                                                             |
| VP2110-Hypothetical protein                    | 10.30/6.90      | 7.10/10.33               | -56  | NA                                                                                                                                                                                             |
|                                                |                 |                          |      | <a href="#">COG2209</a><br><a href="#">COG2878</a><br>-<br><a href="#">COG1805</a><br><a href="#">COG2869</a><br><a href="#">COG1347</a><br><a href="#">COG0177</a><br><a href="#">COG0346</a> |
| VP2102-09-RnfB-related protein                 |                 |                          |      | <a href="#">COG0346</a>                                                                                                                                                                        |
| VP0075-MadN protein                            | 8.07            | 7.55                     | -20  | <a href="#">COG0697</a>                                                                                                                                                                        |
| VP1236-Hypothetical protein                    |                 |                          |      | <a href="#">COG1737</a>                                                                                                                                                                        |
| VP1619-Uroporphyrin-III C-methyltransferase    | 5.33            |                          | -241 | <a href="#">COG1648</a>                                                                                                                                                                        |
| VP1270-Hypothetical protein                    |                 |                          |      | <a href="#">COG0277</a>                                                                                                                                                                        |

|                                                                   |                                |                                   |      |                         |
|-------------------------------------------------------------------|--------------------------------|-----------------------------------|------|-------------------------|
|                                                                   |                                |                                   |      | <a href="#">COG0226</a> |
|                                                                   |                                |                                   |      | <a href="#">COG0573</a> |
|                                                                   |                                |                                   |      | <a href="#">COG0581</a> |
| VPA1461-58-Phosphate ABC transporter                              | 6.36/7.21/9.34/<br>6.10/6.27   | 5.56/5.70/5.78/<br>5.61/7.78/7.92 | -312 | <a href="#">COG1117</a> |
| VP2266-Hypothetical protein                                       |                                |                                   |      | NA                      |
| VP2516-OpaR                                                       | 8.93                           | 6.75                              | -65  | <a href="#">COG1309</a> |
| VP2331-Ribosomal protein L31P family                              | 9.70/5.97                      | 6.65/9.48                         | -61  | <a href="#">COG0254</a> |
| VP2894-Transcriptional regulator, MerR family                     |                                |                                   |      | <a href="#">COG0789</a> |
| VP2916-Uroporphyrinogen decarboxylase                             |                                |                                   |      | <a href="#">COG0407</a> |
| VP2944-O-methyltransferase-related protein                        | 9.82/8.88                      | 10.57/9.49/4.90                   | -1   | <a href="#">COG3315</a> |
| VP3052-FixG-related protein                                       | 5.08                           | 5.40/5.18                         | -42  | <a href="#">COG0526</a> |
| VP2986-CyaY protein                                               |                                |                                   |      | <a href="#">COG1965</a> |
|                                                                   | 8.58/6.17/14.16/<br>9.99       | 7.89/15.11/5.93/<br>5.24/10.20    | -35  | NA                      |
| VP1164-Hypothetical protein                                       | 9.99                           | 5.24/10.20                        | -35  | NA                      |
| VPA0980-Hypothetical protein                                      | 8.83                           | 6.34/4.83                         | -75  | NA                      |
| VPA0663-Putative transcriptional regulator                        | 8.77/10.22                     | 6.72/10.07                        | -1   | <a href="#">COG2207</a> |
| VPA0236-ABC transporter,<br>periplasmic substrate-binding protein |                                |                                   |      | <a href="#">COG1840</a> |
|                                                                   | 7.89/15.11/5.93/<br>5.24/10.20 | 8.58/6.17/14.16/<br>9.99          | -179 | <a href="#">COG1227</a> |
| VP1165-Conserved hypothetical protein                             | 5.24/10.20                     | 9.99                              | -179 | <a href="#">COG1227</a> |
| VPA0701-Putative oxalate/formate antiporter                       | 6.04                           | 7.93                              | -7   | <a href="#">COG0477</a> |
| VPA1449-Hypothetical protein                                      | 6.06                           |                                   | -300 | <a href="#">COG0840</a> |
| VPA0411-Hypothetical protein                                      | 6.25                           | 5.5                               | -293 | <a href="#">COG3217</a> |
| VPA1193-Peptidase T                                               | 6.88                           | 7.42                              | -13  | <a href="#">COG2195</a> |
| VP0936-Membrane protein                                           |                                |                                   |      | <a href="#">COG3217</a> |
| VPA1172-73-Hypothetical protein                                   |                                |                                   |      | NA                      |
| VPA1661-Putative AcsD                                             |                                |                                   |      | NA                      |
| VPA1240-Putative magnesium transporter                            |                                |                                   |      | <a href="#">COG2239</a> |
| VPA1493-ATP-dependent protease LA-related protein                 | 12.93/6.09/6.37                | 8.65/11.94                        | -150 | <a href="#">COG1067</a> |
| VP2161-Conserved hypothetical protein                             | 12.61/7.40                     | 5.28/13.71                        | -79  | <a href="#">COG3016</a> |

|                                                                          |                   |                  |      |                         |
|--------------------------------------------------------------------------|-------------------|------------------|------|-------------------------|
| VP1252-Hypothetical protein                                              |                   |                  |      | NA                      |
| VP1482-Putative response regulator                                       |                   |                  |      | NA                      |
| VPA0563-DPS family protein                                               | 4.97              |                  | -129 | <a href="#">COG0783</a> |
| VPA0004-Peptide ABC transporter, ATP-binding protein                     | 8.71/13.96/6.81   | 6.19/13.83/11.49 | -1   | <a href="#">COG0444</a> |
| VP0675-Transcriptional regulator Crl                                     | 7.71/7.36/6.50    | 7.12/8.61/5.89   | -59  | NA                      |
|                                                                          | 6.36/7.21/9.34/   | 5.56/5.70/5.78/  |      |                         |
| VPA1461-Phosphate ABC transporter                                        | 6.10/6.27         | 5.61/7.78/7.92   | -310 | <a href="#">COG0226</a> |
| VPA0069-Hypothetical protein                                             | 10.92             | 9.10/7.96        | -259 | NA                      |
| VPA1197-Iron-sulfur cluster-binding protein NapF                         | 4.91              |                  | -139 | <a href="#">COG1145</a> |
| VP1451-Putative ferredoxin-type protein NapF                             |                   |                  |      | <a href="#">COG1145</a> |
| VPA0239-ABC transporter, permease protein                                |                   |                  |      | <a href="#">COG1178</a> |
| VP1721-Diaminobutyrate--2-oxoglutarate transaminase                      |                   |                  |      | <a href="#">COG0160</a> |
| VPA1494-95-Hypothetical protein and ABC transporter, ATP-binding protein | 8.65/11.94        | 12.93/6.09/6.37  | -56  | <a href="#">COG1123</a> |
| VPA1496-Prolyl endopeptidase                                             | 9.32              | 10.07            | -56  | <a href="#">COG1505</a> |
| VPA1281-Oxidoreductase                                                   | 6.45              | 7.73             | -1   | <a href="#">COG0673</a> |
| VP2150 Putative nitroreductase                                           |                   |                  |      | <a href="#">COG0778</a> |
| VP2860-Superoxide dismutase, Mn                                          | 9.42/10.70        | 9.46/7.36        | -52  | <a href="#">COG0605</a> |
|                                                                          | 6.21/12.01/12.03/ | 6.34/11.02/12.04 |      |                         |
| VPA0883-Transcriptional regulator, LysR family                           | 7.74/5.08         | /7.40            | -173 | <a href="#">COG0583</a> |
| VPA0535-Putative phosphomannomutase                                      | 7.25/9.87         | 10.08/7.36       | -99  | <a href="#">COG1109</a> |
| VP2072-73-Hypothetical protein and fumarate hydratase                    |                   |                  |      | <a href="#">COG0114</a> |

---

### ***V. vulnificus* (CMPC6)**

---

#### **Iron Metabolism**

|                                        |             |             |     |    |
|----------------------------------------|-------------|-------------|-----|----|
| small regulatory RNA ryhB <sup>4</sup> | 12.16/12.50 | 13.99/11.60 | -29 | NA |
|----------------------------------------|-------------|-------------|-----|----|

|                                                                                              |                           |                |      |                         |
|----------------------------------------------------------------------------------------------|---------------------------|----------------|------|-------------------------|
|                                                                                              |                           |                |      | <a href="#">COG0635</a> |
|                                                                                              |                           |                |      | <a href="#">COG3721</a> |
| VV21615-17-Coproporphyrinogen III oxidase                                                    | 9.16/6.52/8.03            | 5.59/6.52/7.52 | -107 | <a href="#">COG0748</a> |
|                                                                                              |                           |                |      | <a href="#">COG0810</a> |
|                                                                                              |                           |                |      | <a href="#">COG0811</a> |
|                                                                                              |                           |                |      | <a href="#">COG0848</a> |
|                                                                                              |                           |                |      | <a href="#">COG0614</a> |
| VV21614-09- <i>tonB1</i> -system/<br>ABC-type Fe <sup>3+</sup> -siderophore transport system | 5.59/6.52/7.52            | 9.16/6.52/8.03 | -115 | <a href="#">COG0609</a> |
| VV12968-Uncharacterized iron-regulated protein                                               | 10.62                     | 10.62/7.28     | -38  | <a href="#">COG1120</a> |
|                                                                                              |                           |                |      | <a href="#">COG3487</a> |
|                                                                                              |                           |                |      | <a href="#">COG1918</a> |
|                                                                                              |                           |                |      | <a href="#">COG0370</a> |
| VV10149-47-Fe <sup>2+</sup> transport system protein AB                                      | 9.56/5.94                 | 5.94/10.07     | -41  | -                       |
| VV11124-Protein implicated in iron transport                                                 | 5.18                      | 7.72           | -93  | <a href="#">COG1965</a> |
|                                                                                              |                           |                |      | -                       |
|                                                                                              |                           |                |      | -                       |
|                                                                                              |                           |                |      | -                       |
|                                                                                              |                           |                |      | <a href="#">COG0811</a> |
|                                                                                              |                           |                |      | <a href="#">COG0848</a> |
| VV21337VV20364-59-TonB dependent receptor/<br><i>tonB2</i> -system                           | 6.70/10.45/13.89/<br>6.98 | 13.68/12.69    | -57  | <a href="#">COG0457</a> |
|                                                                                              |                           |                |      | <a href="#">COG0457</a> |
|                                                                                              |                           |                |      | <a href="#">COG0614</a> |
|                                                                                              |                           |                |      | <a href="#">COG0609</a> |
|                                                                                              |                           |                |      | <a href="#">COG0609</a> |
| No/VV20110-12-ABC-type enterochelin transport system                                         |                           |                |      | <a href="#">COG1120</a> |
| VV21665-ABC-type Fe <sup>3+</sup> transport system,<br>periplasmic component                 |                           |                |      | <a href="#">COG1840</a> |

|                                                                        |                                              |                                             |      |                                                    |
|------------------------------------------------------------------------|----------------------------------------------|---------------------------------------------|------|----------------------------------------------------|
|                                                                        |                                              |                                             |      | <a href="#">COG1629</a>                            |
|                                                                        |                                              |                                             |      | <a href="#">COG1120</a>                            |
|                                                                        |                                              |                                             |      | <a href="#">COG0614</a>                            |
| No/VV21011-13-OMP/Fe <sup>3+</sup> -siderophores transport system      | 5.33/5.53/8.93/<br>10.96                     | 10.96/8.93/5.53                             | -81  | <a href="#">COG0609</a>                            |
| VV11340-41-Bacterioferritin-associated ferredoxin/<br>Bacterioferritin | 10.41/13.31/6.83                             | 6.83/13.10/10.41                            | -56  | <a href="#">COG2906</a><br><a href="#">COG2193</a> |
| VV20839-37-Chorismate mutase/<br>Siderophore-interacting protein       | 8.95/12.86<br>6.77/5.58/15.00/<br>10.92/4.95 | 9.88/12.86<br>4.95/9.24/13.97/<br>5.58/5.04 | -133 | NA<br><a href="#">COG1169</a>                      |
| VV20835-36-Isochorismate synthase                                      |                                              |                                             | -269 | <a href="#">COG1021</a>                            |
| VV20837-Siderophore-interacting protein                                |                                              |                                             |      | <a href="#">COG2375</a>                            |

### Energy Metabolism

|                                                                                     |      |      |      |                                                                               |
|-------------------------------------------------------------------------------------|------|------|------|-------------------------------------------------------------------------------|
| VV10433-Ferredoxin                                                                  |      |      |      | <a href="#">COG0633</a>                                                       |
| VV10173-Flavodoxin                                                                  |      |      |      | <a href="#">COG0716</a>                                                       |
| VV12587-Ferredoxin                                                                  |      |      |      | <a href="#">COG1145</a>                                                       |
|                                                                                     |      |      |      | <a href="#">COG1132</a>                                                       |
| VV12811-12-Transport ATP-binding protein CydDC                                      | 7.56 | 6.87 | -29  | <a href="#">COG1132</a><br><a href="#">COG2209</a><br><a href="#">COG2878</a> |
|                                                                                     |      |      |      | -<br><a href="#">COG1805</a>                                                  |
|                                                                                     |      |      |      | <a href="#">COG2869</a>                                                       |
| VV13093-98-Electron transport complex protein RnfB                                  | 6.93 | 5.64 | -344 | <a href="#">COG1347</a>                                                       |
| VV12162-Cytochrome d ubiquinol oxidase, subunit I                                   |      |      |      | <a href="#">COG1271</a>                                                       |
| VV13035-Formate-dependent nitrite reductase,<br>periplasmic cytochrome c552 subunit |      |      |      | <a href="#">COG3303</a>                                                       |

|                                                                                     |                 |                 |      |                         |
|-------------------------------------------------------------------------------------|-----------------|-----------------|------|-------------------------|
|                                                                                     |                 |                 |      | <a href="#">COG0437</a> |
|                                                                                     |                 |                 |      | <a href="#">COG3301</a> |
|                                                                                     |                 |                 |      | <a href="#">COG1138</a> |
|                                                                                     |                 |                 |      | <a href="#">COG0526</a> |
| VV13034-30-Nitrate/TMAO reductase,<br>membrane-bound tetraheme cytochrome c subunit | 7.35/9.84       | 10.19/8.42      | -143 | <a href="#">COG3088</a> |
|                                                                                     |                 |                 |      | <a href="#">COG1131</a> |
|                                                                                     |                 |                 |      | <a href="#">COG2386</a> |
|                                                                                     |                 |                 |      | <a href="#">COG0755</a> |
|                                                                                     |                 |                 |      | <a href="#">COG3114</a> |
|                                                                                     |                 |                 |      | <a href="#">COG2332</a> |
|                                                                                     |                 |                 |      | <a href="#">COG1138</a> |
|                                                                                     |                 |                 |      | <a href="#">COG0526</a> |
|                                                                                     |                 |                 |      | -                       |
| VV11961-69-Cytochrome biogenesis protein ABCD                                       | 5.21            |                 | -130 | -                       |
| VV21598-Flavodoxin reductase family 1 protein                                       | 5.68            | 5.68            | -31  | <a href="#">COG3217</a> |
|                                                                                     |                 |                 |      | <a href="#">COG1622</a> |
|                                                                                     |                 |                 |      | <a href="#">COG0843</a> |
|                                                                                     |                 | 4.84/6.71/6.52/ |      | <a href="#">COG1845</a> |
| VV20568-65-Cytochrome o ubiquinol oxidase                                           | 13.90/6.52/4.84 | 14.65           | -316 | <a href="#">COG3125</a> |
| VV11878-Cytochrome c554                                                             | 5.51            | 5.51            | -42  | <a href="#">COG2863</a> |
| VV12587-Ferredoxin                                                                  |                 |                 |      | <a href="#">COG1145</a> |

### Virulence Factors

|                                              |                         |
|----------------------------------------------|-------------------------|
| VV10353-Type IV pilus (Tfp) assembly protein | <a href="#">COG2165</a> |
| VV13118-Methyl-accepting chemotaxis protein  | NA                      |

|                                                       |            |            |      |                         |
|-------------------------------------------------------|------------|------------|------|-------------------------|
| VV20402-Methyl-accepting chemotaxis protein           | 6.11       | 6.11       | -342 | <a href="#">COG0840</a> |
| VV20404-Hemolysin/cytolysin                           | 5.19       | 5.19       | -1   | NA                      |
| VV12107-Methyl-accepting chemotaxis protein           | 4.93       |            | -234 | <a href="#">COG0840</a> |
| VV10186-Methyl-accepting chemotaxis protein           |            |            |      | <a href="#">COG0840</a> |
|                                                       |            |            |      | <a href="#">COG1298</a> |
| VV11949-50-Polar flagellar assembly protein FlhA/FlhH |            |            |      | <a href="#">COG1419</a> |
| VV10215-Polar flagellin FlaC                          |            |            |      | <a href="#">COG1344</a> |
| VV20072-Methyl-accepting chemotaxis protein           | 11.01/6.23 | 6.23/11.01 | -87  | <a href="#">COG0840</a> |
| VV12715-Autotransporter adhesin                       | 6.07       | 5.30       | -230 | NA                      |
| VV21555-Methyl-accepting chemotaxis protein           | 6.00/12.77 | 12.77/6.29 | -49  | <a href="#">COG0840</a> |
| VV21567-Methyl-accepting chemotaxis protein           |            |            |      | <a href="#">COG0840</a> |
| VV12066-Methyl-accepting chemotaxis protein           |            |            |      | <a href="#">COG0840</a> |
| VV11805-Methyl-accepting chemotaxis protein           | 5.04       |            | -342 | <a href="#">COG0840</a> |
| VV12563-CheY-like receiver protein                    |            |            |      | NA                      |
| VV20477-Methyl-accepting chemotaxis protein           | 5.15/7.90  | 6.61/5.15  | -113 | <a href="#">COG0840</a> |
| VV20404-Hemolysin/cytolysin                           | 5.19       | 5.19       | -1   | NA                      |
| VV11805-Methyl-accepting chemotaxis protein           | 5.04       |            | -342 | <a href="#">COG0454</a> |
| VV11774-Methyl-accepting chemotaxis protein           | 5.17       |            | -87  | <a href="#">COG0840</a> |
| VV21623-Methyl-accepting chemotaxis protein           |            |            |      | <a href="#">COG0840</a> |
| VV20404-Cytolysin                                     | 5.19       | 5.19       | -1   | NA                      |

### Miscellaneous

|                                                          |      |      |      |                         |
|----------------------------------------------------------|------|------|------|-------------------------|
| VV11443-Type IV pilus, mannose-sensitive hemagglutinin A |      |      |      | NA                      |
| VV10306-Transcriptional regulator                        | 6.76 | 7.95 | -45  | <a href="#">COG0583</a> |
| VV10299-Conserved hypothetical protein                   |      |      |      | NA                      |
| VV10239-Cation transport ATPase                          | 6.48 | 6.48 | -321 | <a href="#">COG2217</a> |
| VV10017-DNA uptake protein                               |      |      |      | <a href="#">COG1555</a> |
| VV10182-Kef-type K <sup>+</sup> transport system         | 6.47 | 6.47 | -1   | <a href="#">COG0475</a> |
|                                                          |      |      |      | <a href="#">COG1121</a> |
| VV10152-53-Zinc ABC transporter                          | 6.62 | 6.62 | -20  | <a href="#">COG1108</a> |



|                                                             |                     |                 |      |                         |
|-------------------------------------------------------------|---------------------|-----------------|------|-------------------------|
| VV10151-Zinc ABC transporter                                | 6.51                | 6.51/5.68       | -7   | <a href="#">COG0803</a> |
| VV10767-Conserved hypothetical protein                      |                     |                 |      | NA                      |
| VV11839-Hypothetical protein                                | 6.21/5.22           | 5.22/8.78       | -82  | <a href="#">COG1720</a> |
| VV12985-Periplasmic serine protease                         |                     |                 |      | <a href="#">COG0616</a> |
| VV20572-AraC-type DNA-binding domain                        | 5.78/5.48           | 4.82/5.20       | -248 | <a href="#">COG2207</a> |
| VV12386-Hypothetical protein                                |                     |                 |      | <a href="#">COG2020</a> |
| VV10235-ABC-type Fe <sup>3+</sup> -citrate transport system | 6.35                | 6.35            | -280 | NA                      |
| VV12260-L-serine dehydratase 1                              | 7.78                | 7.78/6.01       | -8   | <a href="#">COG1760</a> |
| VV20934-AraC-type DNA-binding domain-containing protein     |                     |                 |      | <a href="#">COG2207</a> |
|                                                             |                     |                 |      | <a href="#">COG1132</a> |
|                                                             |                     |                 |      | <a href="#">COG2995</a> |
| VV12646-48-ABC-type multidrug transport system              | 8.87                | 8.23            | -21  | <a href="#">COG3008</a> |
| VV12798-Hypothetical protein                                |                     |                 |      | NA                      |
| VV20276-Outer membrane receptor protein                     | 14.12               | 7.66/14.05/5.00 | -351 | <a href="#">COG1629</a> |
| VV13101-Hypothetical 16.4 kDa protein in MOTY 3'region      | 12.53/7.10          | 6.24/12.53      | -54  | NA                      |
| VV11114-MadN protein                                        |                     |                 |      | <a href="#">COG0697</a> |
| VV12825-Transcriptional regulator                           | 6.58                | 5.12            | -289 | <a href="#">COG1737</a> |
| VV12702-Uroporphyrin-III C-methyltransferase                |                     |                 |      | <a href="#">COG1648</a> |
| VV12385-Fe-S oxidoreductase                                 | 5.3                 |                 | -224 | <a href="#">COG0277</a> |
|                                                             |                     |                 |      | <a href="#">COG0226</a> |
|                                                             |                     |                 |      | <a href="#">COG0573</a> |
|                                                             |                     |                 |      | <a href="#">COG0581</a> |
| VV21556-59-Phosphate ABC transporter                        | 12.77/6.29          | 6.99/12.77      | -440 | <a href="#">COG1117</a> |
|                                                             |                     |                 |      | <a href="#">COG1840</a> |
|                                                             |                     |                 |      | <a href="#">COG1178</a> |
| VV11660-63-ABC-type Fe <sup>3+</sup> transport system       | 5.51/6.95/9.50/5.45 | 9.50/6.95/5.51  | -65  | <a href="#">COG3841</a> |
| VV11634-SmcR                                                | 6.89                | 6.89            | -141 | <a href="#">COG1309</a> |
| VV11840-Ribosomal protein L31                               | 5.22/8.78           | 6.21/5.22       | -57  | <a href="#">COG0254</a> |
| VV11229-Transcriptional regulator, MerR family              |                     |                 |      | <a href="#">COG0789</a> |
| VV11218-Uroporphyrinogen decarboxylase                      |                     |                 |      | <a href="#">COG0407</a> |

|                                                                          |                 |                  |      |                         |
|--------------------------------------------------------------------------|-----------------|------------------|------|-------------------------|
| VV11167-O-Methyltransferase involved in polyketide biosynthesis          | 6.04/11.99      | 11.99/6.04       | -54  | <a href="#">COG3315</a> |
| VV11038-FixG-related protein                                             |                 |                  |      | <a href="#">COG0526</a> |
| VV12778-Permease                                                         |                 |                  |      | <a href="#">COG0477</a> |
|                                                                          |                 |                  |      | <a href="#">COG0845</a> |
|                                                                          |                 |                  |      | <a href="#">COG3672</a> |
| VV21125-28-Membrane-fusion protein                                       |                 |                  |      | <a href="#">COG2274</a> |
|                                                                          | 9.86/5.27/8.39/ | 6.85/13.76/8.39/ |      |                         |
| VV12889-Conserved hypothetical protein                                   | 14.16/8.93      | 8.33             | -35  | NA                      |
| VV21010-Hypothetical protein                                             | 7.86            | 7.7              | -74  | NA                      |
| VV21119-AraC-type DNA-binding domain-containing protein                  | 6.98            | 6.98             | -190 | <a href="#">COG2207</a> |
| VV12888-Inorganic pyrophosphatase/ exopolyphosphatase                    | 9.94            | 9.94             | -8   | <a href="#">COG1227</a> |
| VV20166-Permease of the major facilitator superfamily                    | 5.4             | 5.4              | -118 | <a href="#">COG0477</a> |
| VV20532-Di- and tripeptidase                                             | 5.04            | 5.04             | -140 | <a href="#">COG2195</a> |
| VV13166-Membrane protein                                                 |                 |                  |      | <a href="#">COG3217</a> |
| VV21016-Outer membrane receptor protein <sup>2</sup>                     |                 |                  |      | <a href="#">COG1629</a> |
| VV20785-Putative magnesium transpor                                      |                 |                  |      | <a href="#">COG2239</a> |
| VV20792-ATP-dependent protease LA-related protein                        | 12.16/5.64      | 8.36/12.16/5.85  | -231 | <a href="#">COG1067</a> |
| VV12020-Conserved hypothetical protein                                   | 12.06/8.72      | 8.72/12.19/6.05  | -113 | <a href="#">COG3016</a> |
| VV12809-Hypothetical protein                                             |                 |                  |      | NA                      |
| VV10327-Transcriptional regulator Crl-like prot                          | 11.1            | 11.2             | -35  | NA                      |
| VV21556-ABC-type phosphate transport system                              | 12.77/6.29      | 6.00/12.77       | -440 | <a href="#">COG0226</a> |
| VV21280-Uncharacterized protein conserved in bacteria                    | 5.64            | 5.64             | -186 | NA                      |
| VV21670-ABC-type Fe <sup>3+</sup> transport system                       | 8.38/6.05       | 6.05/8.38        | -13  | <a href="#">COG1178</a> |
| VV13050-Glutamate decarboxylase                                          |                 |                  |      | <a href="#">COG0160</a> |
| VV20793-94-Hypothetical protein and ABC transporter, ATP-binding protein | 8.36/12.16/5.85 | 12.16/5.64       | -78  | <a href="#">COG1123</a> |
| VV20795-Serine protease of the peptidase family S9A                      | 8.05            | 8.15             | -109 | <a href="#">COG1505</a> |
| VV21089-ABC-type multidrug transport system                              | 5.82            | 5.72             | -211 | <a href="#">COG1132</a> |
| VV20600-Predicted dehydrogenase                                          | 5.42/6.88       | 6.88/5.42        | -1   | <a href="#">COG0673</a> |

|                                                        |                               |                                |      |                         |
|--------------------------------------------------------|-------------------------------|--------------------------------|------|-------------------------|
| VV20834-Dehydrogenase                                  | 4.95/9.24/13.97/<br>5.58/5.04 | 6.77/5.58/15.00/<br>10.92/4.95 | -122 | <a href="#">COG1028</a> |
| VV20844-Non-ribosomal peptide synthetase modules       | 5.14/12.86                    | 13.56/6.78/5.34                | -78  | <a href="#">COG1020</a> |
| VV13131 Nitroreductase                                 |                               |                                |      | <a href="#">COG0778</a> |
| VV21502 Zn-dependent hydrolase                         | 6.67                          |                                | -52  | <a href="#">COG0491</a> |
|                                                        | 6.36/14.71/5.67/              | 8.58/5.67/14.99/               |      |                         |
| VV20831-29-Non-ribosomal peptide synthetase modules    | 8.58                          | 9.41                           | -7   | <a href="#">COG1020</a> |
| VV20843-Outer membrane receptor protein                | 10.58/5.19                    | 5.19/10.85/6.54                | -298 | <a href="#">COG1629</a> |
| VV11252-Superoxide dismutase                           | 10.83/10.35/5.58              | 5.58/10.35/10.83               | -57  | <a href="#">COG0605</a> |
|                                                        |                               |                                |      | <a href="#">COG1770</a> |
|                                                        |                               |                                |      | <a href="#">COG1629</a> |
|                                                        |                               |                                |      | -                       |
|                                                        |                               |                                |      | -                       |
| VV21548-52-Protease II/Outer membrane receptor protein | 10.64/9.24/5.91               | 9.24/10.14                     | -154 | -                       |
| VV20277-Transcriptional regulator, LysR family         | 7.66/14.05/5.00               | 14.12                          | -145 | <a href="#">COG0583</a> |
|                                                        | 4.84/6.71/6.52/               |                                |      |                         |
| VV20569-Putative phosphomannomutase                    | 14.65                         | 13,90/6,52/4,84                | -57  | <a href="#">COG1109</a> |

---

### ***V. vulnificus* (YJ106)**

---

#### **Iron Metabolism**

|                                           |                |                |      |                         |
|-------------------------------------------|----------------|----------------|------|-------------------------|
| small regulatory RNA ryhB <sup>4</sup>    | 10.21/9.46     | 10.18/10.74    | -29  | NA                      |
|                                           |                |                |      | <a href="#">COG0635</a> |
|                                           |                |                |      | <a href="#">COG3721</a> |
| VVA0425-27-Coproporphyrinogen III oxidase | 9.16/5.11/8.03 | 7.52/6.52/5.59 | -101 | <a href="#">COG0748</a> |

|                                                               |                  |                 |      |                         |
|---------------------------------------------------------------|------------------|-----------------|------|-------------------------|
|                                                               |                  |                 |      | <a href="#">COG0810</a> |
|                                                               |                  |                 |      | <a href="#">COG0811</a> |
|                                                               |                  |                 |      | <a href="#">COG0848</a> |
|                                                               |                  |                 |      | <a href="#">COG0614</a> |
| VVA0424-19- <i>tonB1</i> -system/                             |                  |                 |      | <a href="#">COG0609</a> |
| ABC-type Fe <sup>3+</sup> -siderophore transport system       | 7.52/6.52/5.59   | 9.16/5.11/8.03  | -84  | <a href="#">COG1120</a> |
| VV2119-Uncharacterized iron-regulated protein                 | 10.62            | 8.04/7.28       | -50  | <a href="#">COG3487</a> |
|                                                               |                  |                 |      | <a href="#">COG1918</a> |
|                                                               |                  |                 |      | <a href="#">COG0370</a> |
| VV1040-42-Fe <sup>2+</sup> transport system protein AB        | 9.56/5.94        | 10.07           | -41  | -                       |
|                                                               |                  |                 |      | <a href="#">COG1840</a> |
|                                                               |                  |                 |      | <a href="#">COG1178</a> |
| VV2746-44-ABC-type Fe <sup>3+</sup> transport system          | 5.98/8.34/5.45   | 5.51/6.95/9.50  | -41  | <a href="#">COG3841</a> |
|                                                               |                  |                 |      | -                       |
|                                                               |                  |                 |      | -                       |
|                                                               |                  |                 |      | -                       |
|                                                               |                  |                 |      | <a href="#">COG0811</a> |
|                                                               |                  |                 |      | <a href="#">COG0848</a> |
|                                                               |                  |                 |      | <a href="#">COG0457</a> |
| VVA0920-15-TonB dependent receptor/ <i>tonB2</i> -system      | 11.03/5.28       | 12.33/6.85      | -57  | <a href="#">COG0457</a> |
|                                                               |                  |                 |      | <a href="#">COG0614</a> |
|                                                               |                  |                 |      | <a href="#">COG0609</a> |
|                                                               |                  |                 |      | <a href="#">COG0609</a> |
| No/VVA0618-20-ABC-type enterochelin transport system          | 7.29             | 7.31            | -205 | <a href="#">COG1120</a> |
| VVA0477-ABC-type Fe <sup>3+</sup> transport system            |                  |                 |      | <a href="#">COG1840</a> |
| VVA1508-Ferric aerobactin receptor precursor <sup>2</sup>     | 10.47/7.16/10.34 | 9.86/5.83/10.29 | -144 | <a href="#">COG1629</a> |
|                                                               |                  |                 |      | <a href="#">COG1629</a> |
|                                                               |                  |                 |      | <a href="#">COG1120</a> |
|                                                               |                  |                 |      | <a href="#">COG0614</a> |
| No/VVA1504-06-Fe <sup>3+</sup> -siderophores transport system | 7.76             | 5.53/6.89/9.83  | -80  | <a href="#">COG0609</a> |

|                                                                       |                  |                  |      |                                                                               |
|-----------------------------------------------------------------------|------------------|------------------|------|-------------------------------------------------------------------------------|
| VVA0479-ABC-type Fe <sup>3+</sup> transport system                    | 7.37             | 8.38/6.05        | 8    | <a href="#">COG1178</a>                                                       |
| VV3028-27-Bacterioferritin-associated ferredoxin/<br>Bacterioferritin | 6.41/10.63/8.31  | 6.56/12.02/10.41 | -44  | <a href="#">COG2906</a><br><a href="#">COG2193</a>                            |
| VVA1305-02-Chorismate mutase/<br>Siderophore-interacting protein      | 12.86/6.29       | 10.71/4.84       | -124 | NA                                                                            |
| VVA1300-01-Vulnibactin-specific isochorismate<br>synthase/Ligase      | 6.77/15.00/10.92 | 5.58/13.97/9.24  | -270 | <a href="#">COG1169</a><br><a href="#">COG1021</a>                            |
| VVA1299-Vulnibactin-specific 2,3-dihydro-2,3-DHBA<br>dehydrogenase    | 5.58/13.97/9.24  | 6.77/15.00/10.92 | -121 | <a href="#">COG1028</a>                                                       |
| VVA1310-Vulnibactin synthetase, amide synthase subunit                | 14.42/7.07       | 15.18/7.99       | -45  | <a href="#">COG1020</a>                                                       |
| VVA1303-Vulnibactin utilization protein                               |                  |                  |      | <a href="#">COG2375</a>                                                       |
| VVA1309-Ferric vulnibactin outer membrane receptor                    | 10.58/5.19       | 10.85/6.54       | -298 | <a href="#">COG1629</a><br><a href="#">COG1770</a><br><a href="#">COG1629</a> |
|                                                                       |                  |                  |      | -                                                                             |
|                                                                       |                  |                  |      | -                                                                             |
| VVA0361-65-Protease II/Heme transport protein                         | 10.64/8.30       | 10.14/9.24       |      | -                                                                             |
| <b>Energy Metabolism</b>                                              |                  |                  |      |                                                                               |
| VV0760-Ferredoxin                                                     |                  |                  |      | <a href="#">COG0633</a>                                                       |
| VV1016-Flavodoxin                                                     |                  |                  |      | <a href="#">COG0716</a>                                                       |
| VV1703-Ferredoxin                                                     |                  |                  |      | <a href="#">COG1145</a>                                                       |
|                                                                       |                  |                  |      | <a href="#">COG1132</a>                                                       |
| VV1454-53--Transport ATP-binding protein CydDC                        | 7.56             | 6.87             | -30  | <a href="#">COG1132</a><br><a href="#">COG2209</a><br><a href="#">COG2878</a> |
|                                                                       |                  |                  |      | -                                                                             |
|                                                                       |                  |                  |      | <a href="#">COG1805</a>                                                       |
|                                                                       |                  |                  |      | <a href="#">COG2869</a>                                                       |
| VV1192-87-Electron transport complex protein RnfB                     | 6.93             | 5.64             | -285 | <a href="#">COG1347</a>                                                       |

|                                                                                 |                 |           |      |                         |
|---------------------------------------------------------------------------------|-----------------|-----------|------|-------------------------|
| VV2283-Cytochrome d ubiquinol oxidase, subunit I                                |                 |           |      | <a href="#">COG1271</a> |
| VV1250-Formate-dependent nitrite reductase, periplasmic cytochrome c552 subunit |                 |           |      | <a href="#">COG3303</a> |
|                                                                                 |                 |           |      | <a href="#">COG0437</a> |
|                                                                                 |                 |           |      | <a href="#">COG3301</a> |
|                                                                                 |                 |           |      | <a href="#">COG1138</a> |
|                                                                                 |                 |           |      | <a href="#">COG0526</a> |
| VV1251-56-Cytochrome c-type protein NrfB precursor                              | 9.84            | 10.19     | -45  | <a href="#">COG3088</a> |
|                                                                                 |                 |           |      | <a href="#">COG1131</a> |
|                                                                                 |                 |           |      | <a href="#">COG2386</a> |
|                                                                                 |                 |           |      | <a href="#">COG0755</a> |
|                                                                                 |                 |           |      | <a href="#">COG3114</a> |
|                                                                                 |                 |           |      | <a href="#">COG2332</a> |
|                                                                                 |                 |           |      | <a href="#">COG1138</a> |
|                                                                                 |                 |           |      | <a href="#">COG0526</a> |
| VV2455-47-Cytochrome biogenesis protein ABCD                                    |                 |           |      | <a href="#">COG1622</a> |
|                                                                                 |                 |           |      | <a href="#">COG0843</a> |
|                                                                                 |                 |           |      | <a href="#">COG1845</a> |
| VVA1116-13-Cytochrome o ubiquinol oxidase                                       | 13.90/6.52/4.84 | 5.19/6.52 | -292 | <a href="#">COG3125</a> |
| VV2537-Cytochrome c554                                                          |                 |           |      | <a href="#">COG2863</a> |
| VVA1189-Ferredoxin                                                              |                 |           |      | <a href="#">COG1145</a> |
| VV1703-Ferredoxin2 NapF                                                         |                 |           |      | <a href="#">COG1145</a> |

### Virulence Factors

|                                             |                |  |      |                         |
|---------------------------------------------|----------------|--|------|-------------------------|
| VV0835-Tfp pilus assembly protein           |                |  |      | <a href="#">COG2165</a> |
| VVA0963-Methyl-accepting chemotaxis protein | 5.57/4.81/6.11 |  | -343 | <a href="#">COG0840</a> |
| VV2333-Methyl-accepting chemotaxis protein  | 4.93           |  | -233 | <a href="#">COG0840</a> |

|                                                                            |            |            |      |                         |
|----------------------------------------------------------------------------|------------|------------|------|-------------------------|
| VV1004-Methyl-accepting chemotaxis protein                                 | 5.72       | 7.26       | -73  | <a href="#">COG0840</a> |
| VV2467-66-Polar flagellar assembly protein FlhA/FlhH                       |            |            |      | <a href="#">COG1298</a> |
| VV0971-Polar flagellin FlaC                                                |            |            |      | <a href="#">COG1419</a> |
| VVA0579-Methyl-accepting chemotaxis protein                                | 11.01/6.23 | 10.86/5.37 | -87  | <a href="#">COG1344</a> |
| VV1546-Putative RTX protein                                                |            |            |      | <a href="#">COG0840</a> |
| VVA0368-Methyl-accepting chemotaxis protein                                | 12.77/6.00 | 11.29/6.29 | -48  | NA                      |
| VVA0380-Methyl-accepting chemotaxis protein                                |            |            |      | <a href="#">COG0840</a> |
| VV2375-Methyl-accepting chemotaxis protein                                 |            |            |      | <a href="#">COG0840</a> |
| VVA0340-Methyl-accepting chemotaxis protein                                |            |            |      | <a href="#">COG0840</a> |
| VVA1028-Methyl-accepting chemotaxis protein                                | 7.9        | 6.61       | -113 | <a href="#">COG0840</a> |
| VVA0340-Methyl-accepting chemotaxis protein                                |            |            |      | <a href="#">COG0454</a> |
| VV2635-Methyl-accepting chemotaxis protein                                 |            |            |      | <a href="#">COG0840</a> |
| VVA0435-Methyl-accepting chemotaxis protein                                |            |            |      | <a href="#">COG0840</a> |
| VVA0965-Cytotoxin, cytolysin VvhA                                          |            | 5.19       | -8   | NA                      |
| VVA0965-Cytotoxin, cytolysin VvhA                                          |            | 5.19       | 8    | NA                      |
| VVA0965-Cytotoxin, cytolysin VvhA                                          | 5.19       |            | 8    | NA                      |
| <b>Miscellaneous</b>                                                       |            |            |      |                         |
| VV2940-Type IV pilus, mannose-sensitive hemagglutinin A                    |            |            |      | NA                      |
| VV0878-Transcriptional regulator                                           | 6.76       | 7.95       | -45  | <a href="#">COG0583</a> |
| VV0885-Conserved hypothetical protein                                      |            |            |      | NA                      |
| VV0944-Cation transport ATPase                                             | 4.97       | 6.48       | -291 | <a href="#">COG2217</a> |
| VV1109-DNA uptake protein                                                  |            |            |      | <a href="#">COG1555</a> |
| VV1009-Putative glutathione-regulated potassium-efflux system protein KefB | 5.43       | 6.47       | -1   | <a href="#">COG0475</a> |
|                                                                            |            |            |      | <a href="#">COG1121</a> |
| VV1037-36-Zinc ABC transporter                                             | 5.68       | 6.62/6.51  | -87  | <a href="#">COG1108</a> |
| VV1038-Zinc ABC transporter                                                | 6.62/6.51  | 5.68       | -80  | <a href="#">COG0803</a> |
| VV2571-Hypothetical protein                                                | 6.21/5.22  | 8.78       | -81  | <a href="#">COG1720</a> |

|                                                            |            |                |      |                         |
|------------------------------------------------------------|------------|----------------|------|-------------------------|
| VV1169-Hypothetical protein                                |            |                |      | NA                      |
| VV1298-Periplasmic serine protease                         |            |                |      | <a href="#">COG0616</a> |
| VVA1120-AraC-type DNA-binding domain                       | 5.78/5.48  | 4.82/5.20      | -248 | <a href="#">COG2207</a> |
| VV1955-Hypothetical protein                                |            |                |      | <a href="#">COG2020</a> |
| VV1562-ABC-type Fe <sup>3+</sup> -citrate transport system | 7.98/7.56  | 5.76/6.90/7.09 | -70  | NA                      |
| VV2085-L-serine dehydratase 1                              | 7.78       | 6.01/5.51      | -7   | <a href="#">COG1760</a> |
| VV2219-AraC-type DNA-binding domain-containing protein     |            |                |      | <a href="#">COG2207</a> |
|                                                            |            |                |      | <a href="#">COG1132</a> |
|                                                            |            |                |      | <a href="#">COG2995</a> |
| VV1644-42-ABC-type multidrug transport system              | 8.87       | 8.23           | -22  | <a href="#">COG3008</a> |
| VV1467-Hypothetical protein                                |            |                |      | NA                      |
| VVA0781-Outer membrane receptor protein                    | 14.12      | 7.66/14.05     | -75  | <a href="#">COG1629</a> |
| VV1184-Hypothetical protein                                | 12.05/7.10 | 12.53/6.24     | -55  | NA                      |
| VV0073-Permease                                            |            |                |      | <a href="#">COG0697</a> |
| VV1441-Transcriptional regulator                           | 6.58       | 5.12           | -281 | <a href="#">COG1737</a> |
| VV1558-Uroporphyrin-III C-methyltransferase                |            |                |      | <a href="#">COG1648</a> |
| VV1956-Fe-S oxidoreductase GlcD                            | 5.3        |                | -226 | <a href="#">COG0277</a> |
|                                                            |            |                |      | <a href="#">COG0226</a> |
|                                                            |            |                |      | <a href="#">COG0573</a> |
|                                                            |            |                |      | <a href="#">COG0581</a> |
| VVA0369-72-Phosphate ABC transporter                       | 11.29/6.29 | 12.77/6.00     | -437 | <a href="#">COG1117</a> |
| VV2770-SmcR-like protein VvpR                              | 5.28/6.89  |                | -78  | <a href="#">COG1309</a> |
| VV2570-Ribosomal protein L31                               | 8.78       | 6.21/5.22      | -57  | <a href="#">COG0254</a> |
| VV3141-Transcriptional regulator, MerR family              |            |                |      | <a href="#">COG0789</a> |
| VV3150-Uroporphyrinogen decarboxylase                      |            |                |      | <a href="#">COG0407</a> |
| VV0124-O-methyltransferase-related protein                 | 11.99      | 11.99          | -51  | <a href="#">COG3315</a> |
| VV3234-FixG-related protein                                |            |                |      | <a href="#">COG0526</a> |
| VV0085-CyaY protein                                        | 5.18       | 7.72           | -93  | <a href="#">COG1965</a> |
| VV1484-Permease                                            |            |                |      | <a href="#">COG0477</a> |



|                                                                          |                  |                  |      |                         |
|--------------------------------------------------------------------------|------------------|------------------|------|-------------------------|
|                                                                          |                  |                  |      | <a href="#">COG0845</a> |
|                                                                          |                  |                  |      | <a href="#">COG3672</a> |
|                                                                          |                  |                  |      | <a href="#">COG2274</a> |
| VVA1651-54-Membrane-fusion protein                                       |                  |                  |      |                         |
| VV1380-Conserved hypothetical protein                                    | 11.00/7.30/14.16 | 11.64/8.39/13.76 | -36  | NA                      |
| VVA1503-Hypothetical protein                                             | 5.15/7.86        | 5.08/7.70        | -74  | NA                      |
| VVA1645-AraC-type DNA-binding domain-containing protein                  | 5.05             |                  | -82  | <a href="#">COG2207</a> |
| VV1381-Hypothetical protein                                              | 13.76/8.39/11.64 | 14.16/7.84/11.00 | -27  | <a href="#">COG1227</a> |
| VVA0675-Permease                                                         | 5.4              |                  | -85  | <a href="#">COG0477</a> |
| VVA0408-Conserved hypothetical protein                                   | 7.32             | 6.41             | -149 | <a href="#">COG3217</a> |
| VVA1081-Di- and tripeptidase                                             | 5.04             |                  | -24  | <a href="#">COG2195</a> |
| VV1122-Membrane protein                                                  |                  |                  |      | <a href="#">COG3217</a> |
| VVA1252-Putative magnesium transporter                                   |                  |                  |      | <a href="#">COG2239</a> |
| VVA1256-ATP-dependent protease LA-related protein                        | 12.16/5.64       | 12.03/8.36       | -200 | <a href="#">COG1067</a> |
| VV2393-Conserved hypothetical protein                                    | 12.06/8.72       | 6.05/12.19/5.99  | -80  | <a href="#">COG3016</a> |
| VV1457-Hypothetical protein                                              |                  |                  |      | NA                      |
| VV1726-CheY-like receiver protein                                        |                  |                  |      | NA                      |
| VV2050-DPS family protein                                                |                  |                  |      | <a href="#">COG0783</a> |
| VVA0004 Peptide ABC transporter, ATP-binding protein                     | 16.32/5.21/7.49  | 16.09/7.43       | -40  | <a href="#">COG0444</a> |
| VV0857-Transcriptional regulator Crl                                     | 11.1             | 11.2             | -47  | NA                      |
| VVA0369-ABC-type phosphate transport system                              | 11.29/6.29       | 12.77/6.00       | -437 | <a href="#">COG0226</a> |
| VVA0120-Hypothetical protein                                             | 5.64             |                  | -186 | NA                      |
| VV1236-Glutamate decarboxylase                                           |                  |                  |      | <a href="#">COG0160</a> |
| VVA1257-58-Hypothetical protein and ABC transporter, ATP-binding protein | 8.36/12.03/8.15  | 5.64/12.16       | -56  | <a href="#">COG1123</a> |
| VVA1259-Serine protease                                                  | 8.05             | 6.5              | -109 | <a href="#">COG1505</a> |
| VVA1612-ABC-type multidrug transport system                              | 5.17/5.85        | 5.72             | -181 | <a href="#">COG1132</a> |
| VVA1152-Predicted dehydrogenase                                          |                  | 5.42/6.88        | -16  | <a href="#">COG0673</a> |
| VV1154 Nitroreductase                                                    |                  | 5.65             | -33  | <a href="#">COG0778</a> |
| VVA0320 Zn-dependent hydrolase                                           | 5.8              |                  | -2   | <a href="#">COG0491</a> |
| VVA1297-94-Non-ribosomal peptide synthetase modules                      | 8.58/5.67/14.71  | 7.06/14.99/9.41  | -51  | <a href="#">COG1020</a> |

|                                                |                 |                 |      |                         |
|------------------------------------------------|-----------------|-----------------|------|-------------------------|
| VV3115-Superoxide dismutase                    | 10.83/10.35     | 9.28/10.10      | -57  | <a href="#">COG0605</a> |
| VVA0782-Transcriptional regulator, LysR family | 7.66/14.05/5.00 | 14.12           | -145 | <a href="#">COG0583</a> |
| VVA1117-Putative phosphomannomutase            | 6.71/14.65      | 6.52/13.90/6.69 | -56  | <a href="#">COG1109</a> |

---

### ***V. fischeri***

---

#### **Iron Metabolism**

|                                                                  |                      |                      |      |                         |
|------------------------------------------------------------------|----------------------|----------------------|------|-------------------------|
|                                                                  | 4.09/4.36/8.24/      |                      |      |                         |
| small regulatory RNA ryhB                                        | 12.78                | 6.41/12.91           | -29  | NA                      |
| VF1506-Iron-regulated protein FrpC                               | 4.39                 |                      | -164 | NA                      |
| VF1234-Hemin receptor                                            | 10.56/15.68/4.03     | 5.92/13.56/6.60      | -74  | <a href="#">COG1629</a> |
|                                                                  |                      |                      |      | <a href="#">COG0635</a> |
|                                                                  |                      |                      |      | <a href="#">COG3721</a> |
| VF1226-28-Coproporphyrinogen III oxidase                         | 5.21/12.92/4.54/4.23 | 12.37/5.00           | -99  | <a href="#">COG0748</a> |
|                                                                  |                      |                      |      | <a href="#">COG0810</a> |
|                                                                  |                      |                      |      | <a href="#">COG0811</a> |
|                                                                  |                      |                      |      | <a href="#">COG0848</a> |
|                                                                  |                      |                      |      | <a href="#">COG0614</a> |
|                                                                  |                      |                      |      | <a href="#">COG0609</a> |
| VF1225-20- <i>tonB1</i> -system/heme transporter                 | 12.37/5.00           | 5.21/12.92/4.54/4.23 | -64  | <a href="#">COG1120</a> |
| VF1531-Ferrochelataase<br>(uroporphyrin-III C-methyltransferase) | 10.35/4.10           | 8.54                 | -130 | <a href="#">COG1648</a> |
|                                                                  |                      |                      |      | <a href="#">COG1918</a> |
|                                                                  |                      |                      |      | <a href="#">COG0370</a> |
| VF0833-35-Ferrous iron transport protein AB                      | 4.93/12.48           | 6.42/11.46           | -34  | -                       |
|                                                                  |                      |                      |      | <a href="#">COG1840</a> |
|                                                                  |                      |                      |      | <a href="#">COG1178</a> |
| VF2151-49-Iron(III)-transporter                                  | 11.16/4.26           | 11.77/4.22           | -78  | <a href="#">COG3841</a> |
| VFA1162-Iron-regulated protein FrpC                              | 7.65                 | 7.15                 | -365 | NA                      |
| VFA0995-High-affinity iron permease                              | 6.08/11.16/12.81     | 8.73/12.29/5.49      | -54  | <a href="#">COG0672</a> |

|                                                                  |                  |                 |     |                         |
|------------------------------------------------------------------|------------------|-----------------|-----|-------------------------|
|                                                                  |                  |                 |     | -                       |
|                                                                  |                  |                 |     | -                       |
|                                                                  |                  |                 |     | -                       |
|                                                                  |                  |                 |     | -                       |
|                                                                  |                  |                 |     | <a href="#">COG0811</a> |
|                                                                  |                  |                 |     | <a href="#">COG0848</a> |
|                                                                  |                  |                 |     | <a href="#">COG0457</a> |
| VFA0191-97-TonB dependent receptor/ <i>tonB2</i> -system         | 5.76/13.65/4.55  | 11.46/5.41      | -82 | <a href="#">COG0457</a> |
|                                                                  |                  |                 |     | <a href="#">COG0614</a> |
|                                                                  |                  |                 |     | <a href="#">COG0609</a> |
|                                                                  |                  |                 |     | <a href="#">COG0609</a> |
| VFA0827-23-Ferric anguibactin-binding protein                    | 12.28/9.09       | 12.32/9.27      | -64 | <a href="#">COG1120</a> |
| VFA0165-Ferric aerobactin receptor precursor                     | 7.54             | 4.08            | -61 | <a href="#">COG1629</a> |
| VFA0161-Aerobactin siderophore biosynthesis protein, <i>lucA</i> | 4.68/13.06/5.92  | 15.06/10.04     | -51 | NA                      |
|                                                                  |                  |                 |     | <a href="#">COG1629</a> |
|                                                                  |                  |                 |     | <a href="#">COG1120</a> |
|                                                                  |                  |                 |     | <a href="#">COG0614</a> |
| VFA0784-81-Ferrichrome-iron receptor                             | 7.18/5.46        | 7.78/9.14       | -54 | <a href="#">COG0609</a> |
| VF1234-Hemin receptor                                            | 10.56/15.68/4.03 | 5.92/13.56/6.60 | -74 | <a href="#">COG1629</a> |
|                                                                  |                  |                 |     | <a href="#">COG0614</a> |
|                                                                  |                  |                 |     | <a href="#">COG0609</a> |
| No/VFA0827-Ferric anguibactin-binding protein                    | 12.28/9.09       | 12.32/9.27      | -64 | <a href="#">COG0609</a> |
| VFA0823-Vulnibactin utilization protein <i>ViuB</i>              |                  |                 |     | <a href="#">COG2375</a> |
|                                                                  |                  |                 |     | <a href="#">COG1770</a> |
|                                                                  |                  |                 |     | <a href="#">COG1629</a> |
|                                                                  |                  |                 |     | -                       |
|                                                                  |                  |                 |     | -                       |
| VFA0333-29-Protease II/Hemin receptor                            | 13.23/7.67       | 14.09/7.85      | -78 | -                       |
|                                                                  |                  |                 |     | -                       |
| <b>Energy Metabolism</b>                                         |                  |                 |     |                         |
| VF0622-Ferredoxin                                                | 5.15             | 8.34            | -1  | <a href="#">COG0633</a> |

|                                                            |                 |                 |      |                         |
|------------------------------------------------------------|-----------------|-----------------|------|-------------------------|
| VF0812-Flavodoxin                                          |                 |                 |      | <a href="#">COG0716</a> |
| VF1363-Ferredoxin                                          | 11.31/14.20     | 8.99/13.35      | -247 | <a href="#">COG1145</a> |
| VF0901-02-Transport ATP-binding protein CydDC              |                 |                 |      | <a href="#">COG1132</a> |
|                                                            |                 |                 |      | <a href="#">COG1132</a> |
|                                                            |                 |                 |      | <a href="#">COG2209</a> |
|                                                            |                 |                 |      | <a href="#">COG2878</a> |
|                                                            |                 |                 |      | -                       |
|                                                            |                 |                 |      | <a href="#">COG1805</a> |
|                                                            |                 |                 |      | <a href="#">COG2869</a> |
|                                                            |                 |                 |      | <a href="#">COG1347</a> |
|                                                            |                 |                 |      | <a href="#">COG0177</a> |
| VF0935-28-Electron transport complex protein RnfB          | 5.46            |                 | -22  | <a href="#">COG0346</a> |
| VF0953-Cytochrome d ubiquinol oxidase subunit I (CDD cydA) | 5.81            | 7.66            | -237 | <a href="#">COG1271</a> |
| VF1554-Cytochrome c552                                     | 6.73/10.86      | 7.50/12.13      | -225 | <a href="#">COG3303</a> |
|                                                            |                 |                 |      | -                       |
|                                                            |                 |                 |      | <a href="#">COG0437</a> |
|                                                            |                 |                 |      | <a href="#">COG3301</a> |
|                                                            |                 |                 |      | <a href="#">COG1138</a> |
|                                                            |                 |                 |      | <a href="#">COG0526</a> |
| VF1553-48-Cytochrome c-type protein NrfB                   | 7.50/12.13/7.28 | 6.73/10.86/9.63 | -260 | <a href="#">COG3088</a> |
|                                                            |                 |                 |      | <a href="#">COG1131</a> |
|                                                            |                 |                 |      | <a href="#">COG2386</a> |
|                                                            |                 |                 |      | <a href="#">COG0755</a> |
|                                                            |                 |                 |      | <a href="#">COG3114</a> |
|                                                            |                 |                 |      | <a href="#">COG2332</a> |
|                                                            |                 |                 |      | <a href="#">COG1138</a> |
|                                                            |                 |                 |      | <a href="#">COG0526</a> |
|                                                            |                 |                 |      | -                       |
| VF1824-16-Cytochrome biogenesis protein ABCD               | 4.24/5.31       | 8.02            | -147 | -                       |

|                                      |           |            |     |                         |
|--------------------------------------|-----------|------------|-----|-------------------------|
| VF1943-Cytochrome c554               |           |            |     | <a href="#">COG2863</a> |
| VF1907-Ferredoxin-type protein NapF  | 5.28      |            | -37 | <a href="#">COG1145</a> |
| VFA0084-Ferredoxin-type protein NapF | 8.89/4.13 | 10.08/6.15 | 15  | <a href="#">COG1145</a> |
| VFA0116-Virulence factor MviM        | 8.03      | 7.72       | -1  | <a href="#">COG0673</a> |

### Virulence Factors

|                                                        |                |           |      |                         |
|--------------------------------------------------------|----------------|-----------|------|-------------------------|
| VF0572-Pili subunit PilA1                              |                |           |      | <a href="#">COG2165</a> |
| VF0696-Accessory colonization factor AcfD-like protein | 5.69/4.10/4.53 |           | -243 | NA                      |
| VF1369-Methyl-accepting chemotaxis protein             | 5.30           |           | -97  | <a href="#">COG0840</a> |
| VF1789-Methyl-accepting chemotaxis protein             | 7.58           | 5.02      | -100 | <a href="#">COG0840</a> |
|                                                        |                |           |      | <a href="#">COG1298</a> |
| VF1837-36-Polar flagellar assembly protein FlhA/FlhH   |                |           |      | <a href="#">COG1419</a> |
| VF1866-Flagellin, FlaA                                 | 5.61           |           | -66  | <a href="#">COG1344</a> |
| VFA0092-Methyl-accepting chemotaxis protein            | 4.60           | 6.99      | -156 | <a href="#">COG0840</a> |
|                                                        |                |           |      | <a href="#">COG0845</a> |
|                                                        |                |           |      | <a href="#">COG3672</a> |
| VFA1168-65-Type I secretion, HlyD family               | 8.44           | 6.95      | -171 | <a href="#">COG2274</a> |
| VFA0448-Methyl-accepting chemotaxis protein            | 5.28           |           | -35  | <a href="#">COG0840</a> |
| VFA0481-Methyl-accepting chemotaxis protein            | 6.35           | 4.81      | -45  | <a href="#">COG0840</a> |
| VFA0677-Methyl-accepting chemotaxis protein            | 7.39           | 4.15      | -83  | <a href="#">COG0840</a> |
| VFA0389-Methyl-accepting chemotaxis protein            | 4.58           | 6.85      | -195 | <a href="#">COG0840</a> |
| VF1138-Methyl-accepting chemotaxis protein             | 4.84/4.42      |           | -106 | <a href="#">COG0840</a> |
| VFA0169-Methyl-accepting chemotaxis protein            |                |           |      | <a href="#">COG0840</a> |
| VF1138-Methyl-accepting chemotaxis protein             | 4.84/4.42      |           | -106 | <a href="#">COG0454</a> |
| VFA0473-Methyl-accepting chemotaxis protein            | 4.28/6.15      | 4.11/4.15 | -1   | <a href="#">COG0745</a> |
| VFA0170-Methyl-accepting chemotaxis protein            | 6.57           | 5.05      | -260 | <a href="#">COG0840</a> |
| VFA0389-Methyl-accepting chemotaxis protein            | 4.58           | 6.85      | -195 | <a href="#">COG0840</a> |

### Miscellaneous

|                                                         |  |  |  |    |
|---------------------------------------------------------|--|--|--|----|
| VF0366-Type IV pilus, mannose-sensitive hemagglutinin A |  |  |  | NA |
|---------------------------------------------------------|--|--|--|----|

|                                                                   |                  |                  |      |                         |
|-------------------------------------------------------------------|------------------|------------------|------|-------------------------|
| VF0591-Glycine cleavage system transcriptional activator          | 8.10/4.66        | 7.50             | -51  | <a href="#">COG0583</a> |
| VF0596-Conserved hypothetical protein                             | 9.74/5.61        | 8.61             | -134 | NA                      |
| VF0781-Copper-exporting ATPase                                    | 4.63             | 7.01             | -38  | <a href="#">COG2217</a> |
| VF0801-COME operon protein 1                                      | 6.13             | 7.19             | -1   | <a href="#">COG1555</a> |
| VF0805-Glutathione-regulated potassium-efflux system protein KefC |                  |                  |      | <a href="#">COG0475</a> |
|                                                                   |                  |                  |      | <a href="#">COG1121</a> |
| VF0829-28-Zinc ABC transporter                                    | 8.05             | 6.77             | -24  | <a href="#">COG1108</a> |
| VF0830-Zinc ABC transporter                                       | 6.77             | 8.05             | -83  | <a href="#">COG0803</a> |
| VF0683-Putative transcriptional regulator                         |                  |                  |      | <a href="#">COG1720</a> |
| VF0737-Guanine-hypoxanthine permease                              |                  |                  |      | <a href="#">COG2252</a> |
| VF1647-Hypothetical protein                                       |                  |                  |      | NA                      |
| VF0988-Hypothetical protein                                       | 4.68             |                  | -181 | NA                      |
| VF1040-Possible protease SohB                                     | 9.39             | 9.11             | -82  | <a href="#">COG0616</a> |
| VF1074-Transcriptional regulator, AraC family                     |                  |                  |      | <a href="#">COG2207</a> |
| VF1103-Hypothetical protein                                       | 4.77             | 6.09             | -62  | <a href="#">COG2020</a> |
| VF1175-Conserved hypothetical protein                             | 4.08/5.18        | 4.68/4.86        | -1   | NA                      |
| VF1176 L-serine dehydratase                                       | 4.52             | 4.25             | -53  | <a href="#">COG1760</a> |
| VFA0931-Transcriptional regulatory, AraC-like                     |                  |                  |      | <a href="#">COG2207</a> |
|                                                                   |                  |                  |      | <a href="#">COG1132</a> |
|                                                                   |                  |                  |      | <a href="#">COG2995</a> |
| VF1277-75-Transporter                                             | 7.06/9.23        | 6.77/9.84        | -19  | <a href="#">COG3008</a> |
| VF1494-Transporter                                                | 6.13/5.04        | 6.76/4.42        | -60  | NA                      |
|                                                                   | 11.31/4.40/6.28/ | 11.90/4.54/4.48/ |      |                         |
| VF1190-Conserved hypothetical protein                             | 13.79/4.58/5.69  | 4.53/5.69        | -86  | <a href="#">COG3487</a> |
| VF0927-Hypothetical protein                                       | 10.66            | 9.76/4.02        | -69  | NA                      |
| VF0982-Transporter                                                |                  |                  |      | <a href="#">COG0697</a> |
| VF0891-Transcriptional regulator, RpiR                            |                  |                  |      | <a href="#">COG1737</a> |
| VF1525-Aerobic glycerol-3-phosphate dehydrogenase subunit C       | 6.63             | 5.52             | -160 | <a href="#">COG0277</a> |

|                                                           |                  |                  |      |                         |
|-----------------------------------------------------------|------------------|------------------|------|-------------------------|
|                                                           |                  |                  |      | <a href="#">COG0226</a> |
|                                                           |                  |                  |      | <a href="#">COG0573</a> |
|                                                           |                  |                  |      | <a href="#">COG0581</a> |
| VF1610-13-Phosphate transport system                      | 5.96             |                  | -173 | <a href="#">COG1117</a> |
| VF1911-Hypothetical protein                               | 9.46/6.66        | 10.99/6.42       | -35  | NA                      |
| VF2177-LitR, transcriptional regulator                    | 9.92/4.67        | 7.11             | -64  | <a href="#">COG1309</a> |
| VF2273-50S ribosomal protein L31                          | 4.94             |                  | -303 | <a href="#">COG0254</a> |
|                                                           |                  |                  |      | <a href="#">COG1053</a> |
|                                                           |                  |                  |      | <a href="#">COG0479</a> |
|                                                           |                  |                  |      | <a href="#">COG3029</a> |
| VF2334-37-Fumarate reductase flavoprotein subunit         | 11.24/6.99       | 12.69/4.65       | -299 | <a href="#">COG3080</a> |
| VF2393-Transcriptional regulator, MerR family             |                  |                  |      | <a href="#">COG0789</a> |
| VF2402-Uroporphyrinogen decarboxylase HemE                | 6.45             | 4.17             | -180 | <a href="#">COG0407</a> |
| VF2441-Hypothetical protein                               | 15.28/7.53       | 13.96            | -46  | <a href="#">COG3315</a> |
| VF2551-Hypothetical protein                               | 5.09             |                  | -29  | <a href="#">COG0526</a> |
| VF2486-CyaY protein                                       |                  |                  |      | <a href="#">COG1965</a> |
| VFA0140-Hypothetical protein                              |                  |                  |      | NA                      |
| VFA0977-Possible efflux permease                          | 7.82             | 4.35             | -65  | <a href="#">COG0477</a> |
|                                                           | 5.08/6.96/13.63/ | 6.56/7.42/12.64/ |      |                         |
| VFA0848-Conserved hypothetical protein                    | 4.56             | 7.17             | -64  | NA                      |
| VFA0156-Hypothetical protein                              | 12.52            | 13.37            | -79  | NA                      |
| VFA0833-AraC-type DNA-binding domain-containing protein   | 5.26/4.12        |                  | -192 | <a href="#">COG2207</a> |
| VFA0421-Manganese-dependent inorganic pyrophosphatase     |                  |                  |      | <a href="#">COG1227</a> |
| VFA0611-Oxalate/formate antiporter                        | 4.88             |                  | -4   | <a href="#">COG0477</a> |
| VFA0264-Oxidoreductase (iron-sulfur cluster biosynthesis) |                  |                  |      | <a href="#">COG3217</a> |
| VFA0253-Tripeptidase T                                    |                  |                  |      | <a href="#">COG2195</a> |
| VFA0205-Hypothetical membrane spanning protein            |                  |                  |      | <a href="#">COG3217</a> |
| VFA1019-18-Hypothetical cytosolic protein                 |                  |                  |      | NA                      |
| VFA0120-Hypothetical cytosolic protein                    |                  |                  |      | NA                      |

|                                                       |                 |                 |      |                         |
|-------------------------------------------------------|-----------------|-----------------|------|-------------------------|
| VFA1047-Mg <sup>2+</sup> transporter MgtE             | 5.72            | 4.02            | -255 | <a href="#">COG2239</a> |
| VFA0414-ATP-dependent protease La                     | 4.07            | 4.70            | -32  | <a href="#">COG1067</a> |
|                                                       | 9.06/6.63/4.30/ | 8.49/8.62/8.53/ |      |                         |
| VFA0756-Putative lipoprotein                          | 9.03/11.20/4.63 | 12.58/5.29      | -59  | <a href="#">COG3016</a> |
| VFA0769-Agglutination protein                         | 4.49            |                 | -149 | NA                      |
| VFA0795-Two component response regulator              | 4.83            |                 | -7   | NA                      |
| VFA0200-Oligosaccharide transport ATP-binding protein | 10.82/12.24     | 9.20/11.16      | -37  | <a href="#">COG0444</a> |
| VF1610-Phosphate-binding protein                      |                 |                 |      | <a href="#">COG0226</a> |
| VFA1123-Diaminobutyrate--pyruvate aminotransferase    |                 |                 |      | <a href="#">COG0160</a> |
| VF1122-Prolyl endopeptidase                           |                 |                 |      | <a href="#">COG1505</a> |
| VFA0509-Multidrug resistance ABC transporter          | 5.56            | 6.92            | -217 | <a href="#">COG1132</a> |
| VF0921-Superoxide dismutase                           |                 |                 |      | <a href="#">COG0605</a> |
| VFA1160-Transcriptional regulator                     | 5.45/4.92       |                 | -29  | <a href="#">COG0583</a> |
| VF1056-Phosphoglucomutase                             | 13.15/5.33      | 10.70/6.31      | -58  | <a href="#">COG1109</a> |

# Identified by Mey et al., 2005b

<sup>1</sup>identified by Funahashi et al., 2003

<sup>2</sup>identified by Tanabe et al., 2005

<sup>3</sup>identified by Litwin et al., 2001

<sup>4</sup>Identified by Mey et al., 2005a

\*Predicted by Panina et al., 2001

Grey cells indicates no predicted Fur-boxes in this study

( ) indicates pseudogenes/disrupted genes

in *V. salmonicida*
